# Supplementary material for: Dietary intake and biomarkers of alpha linolenic acid and risk of all cause, cardiovascular, and cancer mortality: systematic review and dose-response meta-analysis of cohort studies
Source: PubMed Central journal article supplement — BMJ. 2021 Oct 14;375:n2213. doi: 10.1136/bmj.n2213 (PMC8513503; doi:10.1136/bmj.n2213), 2021-10-14
Supplement: nags065034.ww.pdf [file nags065034.ww.pdf]

**Supplemental Table 1:** The terms used to search relevant publications on the relation between ALA and risk of mortality

| In PubMed, Scopus, and ISI Web of Science                                                                                                   | n     |
|---------------------------------------------------------------------------------------------------------------------------------------------|-------|
| 1. "Fatty Acids, Omega-3"                                                                                                                   |       |
| 2. "Omega-3"                                                                                                                                |       |
| 3. "Omega 3"                                                                                                                                |       |
| 4. "n-3 PUFA"                                                                                                                               |       |
| 5. "n-3 Fatty Acids"                                                                                                                        |       |
| 6. "n-3 Fatty Acid"                                                                                                                         |       |
| 7. "n-3 Oils"                                                                                                                               |       |
| 8. "n-3 Oil"                                                                                                                                |       |
| 9. "Unsaturated Fatty Acid"                                                                                                                 |       |
| 10. "Polyunsaturated Fatty Acid"                                                                                                            |       |
| 11. "alpha-Linolenic Acid"                                                                                                                  |       |
| 12. "α-Linolenic Acid"                                                                                                                      |       |
| 13. "Linolenate"                                                                                                                            |       |
| 14. "Linolenic Acid"                                                                                                                        |       |
| 15. (1 OR 2 OR 3 OR 4 OR 5 OR 6 OR 7 OR 8 OR 9 OR 10 OR 11 OR 12 OR 13 OR 14)                                                               |       |
| 16. mortality                                                                                                                               |       |
| 17. death                                                                                                                                   |       |
| 18. fatal                                                                                                                                   |       |
| 19. survive                                                                                                                                 |       |
| 20. "Neoplasms"                                                                                                                             |       |
| 21. "Cancer Survivors"                                                                                                                      |       |
| 22. "cardiovascular disease"                                                                                                                |       |
| 23. "coronary disease"                                                                                                                      |       |
| 24. "Myocardial Ischemia"                                                                                                                   |       |
| 25. "coronary artery disease"                                                                                                               |       |
| 26. "myocardial infarction"                                                                                                                 |       |
| 27. stroke                                                                                                                                  |       |
| 28. (16 OR 17 OR 18 OR 19 OR 20 OR 21 OR 22 OR 23 OR 24 OR 25 OR 26 OR 27)                                                                  |       |
| (15 AND 28) <b>In PubMed</b>                                                                                                                | 5903  |
| (15 AND 28) <b>In Scopus</b>                                                                                                                | 8023  |
| (15 AND 28) <b>In ISI Web of Science</b>                                                                                                    | 4438  |
| <b>Duplicate</b>                                                                                                                            | 5991  |
| <b>In Google Scholar</b>                                                                                                                    | 500   |
| "Linolenic acid" and mortality                                                                                                              |       |
| By searching the above combination in this engine, we screened the first 500 relevancy ranked papers to avoid missing any eligible studies. |       |
| <b>Total</b>                                                                                                                                | 12873 |

**Supplemental Table 2:** Characteristics of included studies on the association between ALA intake (or tissue biomarkers) and all-cause mortality in adults aged >18 years

| Author             | Country | Age*  | Sample size  | Follow up (years) ‡ | Deaths  | Exposure       | Exposure assessment | Health status† | Median/cutoff point                                           | RR (95% CI)                                                                                           | Adjustment                                                                                                                                                                                                                                                                                                                                                                                                                                                                                               |
|--------------------|---------|-------|--------------|---------------------|---------|----------------|---------------------|----------------|---------------------------------------------------------------|-------------------------------------------------------------------------------------------------------|----------------------------------------------------------------------------------------------------------------------------------------------------------------------------------------------------------------------------------------------------------------------------------------------------------------------------------------------------------------------------------------------------------------------------------------------------------------------------------------------------------|
| Lelli et al. 2019  | Italy   | >65   | M/F: 927     | 9                   | 318     | Dietary intake | FFQ                 | Healthy        | NR                                                            | 1<br>0.83 (0.58-1.18)<br>0.87 (0.62-1.22)<br>0.84 (0.59-1.21)                                         | Age, sex, education, BMI, estimated glomerular filtration rate (CKD-EPI), caloric intake/body weight, smoke, hypertension, diabetes, alcohol and oleic acid consumption.                                                                                                                                                                                                                                                                                                                                 |
|                    |         |       |              |                     |         | Total serum    | GC                  |                | NR                                                            | 1<br>0.77 (0.55-1.07)<br>0.74 (0.52-1.05)<br>0.75 (0.53-1.07)                                         |                                                                                                                                                                                                                                                                                                                                                                                                                                                                                                          |
| Zhuang et al. 2019 | US      | 50-71 | M/F: 521,120 | 16                  | 129,328 | Dietary intake | FFQ                 | Healthy        | NR                                                            | 1<br>1.00 (0.98-1.02)<br>1.02 (1.00-1.04)<br>1.03 (1.01-1.06)<br>1.05 (1.02-1.08)<br>1.00 (0.97-1.04) | Age, gender, BMI, race, education, marital status, household income, smoking, alcohol drinking, physical activity, multi-vitamin use, aspirin use, history of hypertension, history of hypercholesterolemia, perceived health condition, history of heart disease, stroke, diabetes, and cancer at baseline, hormones use for women, intake of total energy, percentages of energy intake from protein, carbohydrates and remaining fatty acids.                                                         |
| Wang et al. 2016   | US      | 40-75 | M: 42884     | 26                  | 12,990  | Dietary intake | FFQ                 | Healthy        | 0.38 %E<br>0.45 %E<br>0.50 %E<br>0.56 %E<br>0.68 %E<br>Per 1g | 1<br>1.00 (0.94-1.06)<br>1.02 (0.96-1.08)<br>1.04 (0.98-1.10)<br>1.01 (0.94-1.08)<br>1.02 (0.98-1.06) | Age, Caucasian, marital status, BMI, physical activity, smoking status, alcohol consumption, multivitamin use, vitamin E supplementation use, current aspirin use, family history of myocardial infarction, family history of diabetes, family history of cancer, history of hypertension, history of hypercholesterolemia, intakes of total energy, dietary cholesterol and percentage of energy intake from dietary protein, and remaining fatty acids, and menopausal status and hormone use in women |
| Wang et al. 2016   | US      | 30-55 | F: 83,349    | 32                  | 20,314  | Dietary intake | FFQ                 | Healthy        | 0.41 %E<br>0.48 %E<br>0.53 %E<br>0.59 %E<br>0.70 %E<br>Per 1g | 1<br>1.00 (0.95-1.04)<br>1.05 (1.00-1.10)<br>1.02 (0.97-1.07)<br>0.98 (0.93-1.04)<br>1.01 (0.99-1.03) | Age, Caucasian, marital status, BMI, physical activity, smoking status, alcohol consumption, multivitamin use, vitamin E supplementation use, current aspirin use, family history of myocardial infarction, family history of diabetes, family history of cancer, history of hypertension, history of hypercholesterolemia, intakes of total energy, dietary cholesterol and percentage of energy intake from dietary protein, and remaining fatty acids, and menopausal status and hormone use in women |
| Jiao et al. 2019   | US      | 30-75 | M/F: 11264   | 11                  | 2502    | Dietary intake | FFQ                 | Unhealthy      | 0.40 %E<br>0.49 %E<br>0.58 %E<br>0.76 %E                      | 1<br>0.98 (0.87-1.09)<br>0.80 (0.70-0.91)<br>0.88 (0.76-1.02)                                         | Age, sex, survey period, ethnicity, BMI at diagnosis, physical activity, smoking status, smoking pack years, alcohol consumption, multivitamin use, current aspirin use, family history of myocardial infarction, family history of                                                                                                                                                                                                                                                                      |

|                       |         |       |                |      |      |                |             |           |                                                                      |                                                                                                        |                                                                                                                                                                                                                                                                                   |
|-----------------------|---------|-------|----------------|------|------|----------------|-------------|-----------|----------------------------------------------------------------------|--------------------------------------------------------------------------------------------------------|-----------------------------------------------------------------------------------------------------------------------------------------------------------------------------------------------------------------------------------------------------------------------------------|
|                       |         |       |                |      |      |                |             |           | Per 1g                                                               | 0.89 (0.81-0.98)                                                                                       | diabetes, history of hypercholesterolemia, history of hypertension, duration of diabetes, total energy intake, dietary cholesterol, and percentage of energy from dietary protein and remaining fatty acids.                                                                      |
| Khankari et al. 2015  | US      | 20-98 | F: 1463        | 14.7 | 485  | Dietary intake | FFQ         | Unhealthy | . <0.38 g/d<br>0.38-0.68 g/d<br>0.68-1.10 g/d<br>>1.10 g/d<br>Per 1g | 1<br>1.18 (0.91-1.52)<br>1.18 (0.90-1.55)<br>1.14 (0.83-1.57)<br>1.15 (0.89-1.49)                      | Age and total energy intake                                                                                                                                                                                                                                                       |
| Fretts et al. 2014    | US      | >65   | M/F:<br>2709   | 12   | 1757 | Dietary intake | FFQ         | Healthy   | 0.42 %E<br>0.47 %E<br>0.51 %E<br>0.55 %E<br>0.63 %E<br>Per 1g        | 1<br>0.98 (0.84-1.15)<br>0.88 (0.75-1.03)<br>0.86 (0.73-1.02)<br>0.73 (0.61-0.88)<br>0.88 (0.78-0.98)  | Age, sex, total energy intake, race, enrolment site, education, smoking status, diabetes, BMI, alcohol consumption and treated hypertension.                                                                                                                                      |
|                       |         |       |                |      |      | Phospholipids  | GC          |           | 0.09 %FA<br>0.12 %FA<br>0.14 %FA<br>0.17 %FA<br>0.22 %FA<br>Per 1-SD | 1<br>1.09 (0.93, 1.26)<br>1.09 (0.94-1.27)<br>0.95 (0.81-1.11)<br>0.93 (0.79-1.08)<br>0.97 (0.90-1.03) |                                                                                                                                                                                                                                                                                   |
| Zhuang et al. 2019    | China   | >20   | M/F:<br>14,117 | 14   | 1007 | Dietary intake | Food recall | Healthy   | 0-0.65 g/d<br>0.65-1.00 g/d<br>1.00-1.53 g/d<br>>1.53 g/d<br>Per 1g  | 1<br>0.93 (0.77-1.13)<br>0.93 (0.76-1.13)<br>1.23 (1.01-1.50)<br>0.93 (0.86-1.00)                      | Age, gender, BMI, education, marital status, residence, physical activity, smoking, alcohol drinking status, history of hypertension, history of diabetes, intake of total energy, vegetables, fruits, red meat and saturated fat.                                                |
| Zhuang et al. 2019    | US      | >20   | M/F:<br>36,032 | 9    | 4826 | Dietary intake | Food recall | Healthy   | 0-0.70 g/d<br>0.70-1.15 g/d<br>1.15-1.80 g/d<br>>1.80 g/d<br>Per 1g  | 1<br>0.99 (0.89-1.10)<br>0.90 (0.78-1.04)<br>0.84 (0.70-1.00)<br>1.10 (0.98-1.22)                      | Age, gender, race-ethnicity, BMI, education, marital status, physical activity, smoking, alcohol drinking status, history of hypertension, history of diabetes, family history of cardiovascular disease, intake of total energy, vegetables, fruits, red meat and saturated fat. |
| Sala-Vila et al. 2016 | Spanish | 55-80 | M/F:<br>7202   | 5.9  | 431  | Dietary intake | FFQ         | Healthy   | <0.7 %E<br>>0.7 %E                                                   | 1<br>0.72 (0.55-0.93)                                                                                  | Age, sex, intervention group, body mass index, smoking status, physical activity, total energy intake, history of diabetes, history of hyperlipidemia, history of hypertension, alcohol intake, and dietary factors (fiber, vegetables, fruits, and red meat).                    |
| Fortes et al. 2000    | Italy   | >65   | M/F:<br>162    | 5    | 53   | Dietary intake | FFQ         | Healthy   | <1.1 g/d<br>1.1-1.5 g/d<br>>1.5 g/d<br>Per 1g                        | 1<br>0.74 (0.37-1.50)<br>0.51 (0.23-1.13)<br>0.71 (0.45-1.10)                                          | Age, sex, education, BMI, smoking, cognitive function, and chronic diseases.                                                                                                                                                                                                      |
| Richman et al. 2013   | US      | 40-75 | M: 4577        | 8.4  | 1064 | Dietary intake | FFQ         | Unhealthy | 0.36 %E<br>0.44 %E                                                   | 1<br>0.94 (0.78, 1.13)                                                                                 | Age at diagnosis, energy, time since diagnosis, treatment, Gleason sum, clinical stage, diagnostic PSA, number of                                                                                                                                                                 |

|                      |           |           |           |      |      |                    |             |           |                                                                      |                                                                                                       |                                                                                                                                                                                                                                                                                                                                   |
|----------------------|-----------|-----------|-----------|------|------|--------------------|-------------|-----------|----------------------------------------------------------------------|-------------------------------------------------------------------------------------------------------|-----------------------------------------------------------------------------------------------------------------------------------------------------------------------------------------------------------------------------------------------------------------------------------------------------------------------------------|
|                      |           |           |           |      |      |                    |             |           | 0.50 %E<br>0.58 %E<br>0.74 %E                                        | 0.81 (0.66, 1.00)<br>0.99 (0.80, 1.23)<br>0.87 (0.67-1.12)                                            | PSA screening tests prior to diagnosis, body mass index, smoking, vigorous activity, and intake of calcium, alcohol, protein, saturated fat, monounsaturated fat, trans fat, linoleic acid, long-chain omega-3 fatty acids and pre-diagnostic intake of polyunsaturated fat based on the 1986 FFQ.                                |
| Dolecek et al. 1991  | US        | 35-57     | M: 12,866 | 8    | 439  | Dietary intake     | Food recall | Healthy   | 0.87 g/d<br>1.27 g/d<br>1.57 g/d<br>1.92 g/d<br>2.8 g/d<br>Per 1g    | 1<br>0.94 (0.72-1.22)<br>0.68 (0.52-0.92)<br>0.86 (0.66-1.13)<br>0.67 (0.50-0.90)<br>0.84 (0.76-0.92) | Unadjusted                                                                                                                                                                                                                                                                                                                        |
| Gopinath et al. 2011 | Australia | >49       | M/F: 2514 | 15   | 214  | Dietary intake     | FFQ         | Healthy   | 0-0.54 g/d<br>0.55-0.73 g/d<br>0.74-3.01 g/d<br>Per 1g               | 1<br>0.95 (0.68-1.34)<br>0.74 (0.51-1.08)<br>0.84 (0.69-1.03)                                         | Age, sex, total energy intake, for current smoking, alcohol consumption, poor self-rated health, BMI, presence of diabetes, total fiber, dietary glycemic index, use of corticosteroid drugs, and white blood cell count.                                                                                                         |
| Marklund et al. 2019 | Swedish   | >60       | M/F: 4232 | 14.5 | 456  | Cholesteryl esters | GC          | Healthy   | 0.68 %FA<br>0.81 %FA<br>0.93 %FA<br>1.01 %FA<br>Per 1-SD             | 1<br>0.99 (0.75-1.30)<br>1.15 (0.88-1.49)<br>1.15 (0.89-1.50)<br>1.02 (0.97-1.07)                     | Sex, BMI, smoking, physical activity, education, alcohol intake, diabetes, drug-treated hypertension, and drug-treated hypercholesterolemia.                                                                                                                                                                                      |
| Erkkila et al. 2003  | French    | 33-74     | M/F: 398  | 5    | 35   | Cholesteryl esters | GC          | Unhealthy | <0.77<br>0.77-0.89<br>>0.89<br>Per 1-SD                              | 1<br>0.76 (0.32-1.82)<br>0.33 (0.11-0.96)<br>0.93 (0.86-1.01)                                         | Age, sex, diagnostic category, energy intake, serum cholesterol, serum triacylglycerol, diabetes (diagnosis or plasma glucose concentration>7 mmol/L), BMI, and education.                                                                                                                                                        |
| Lindberg et al. 2008 | Norway    | 72.5–97.7 | M/F: 254  | 3    | NR   | Phospholipids      | GC          | Unhealthy | <0.14 %FA<br>0.14-0.18 %FA<br>0.18-0.21 %FA<br>>0.21 %FA<br>Per 1-SD | 1<br>1.00 (0.59-1.69)<br>0.83 (0.49-1.40)<br>0.91 (0.54-1.51)<br>0.96 (0.85-1.09)                     | Age, sex, assignment to Geriatric Evaluation and Management Unit treatment, Barthel Index, residence, current smoking status, history of cardiovascular disease, and HDL-cholesterol, LDL-cholesterol, prealbumin, and $\alpha$ -tocopherol concentrations.                                                                       |
| Harris et al. 2017   | US        | 65–80     | F: 6501   | 15.9 | 1851 | Erythrocyte        | GC          | Healthy   | Per 1-SD                                                             | 0.98 (0.91-1.05)                                                                                      | Age, race, HT assignment, BMI, highest education, smoking pack-year, physical activity, weekly alcohol intake, waist circumference, region, family history of cancer, family history of CVD, aspirin use, high cholesterol requiring pills (ever), and a history of hypertension, diabetes, cardiovascular disease and/or cancer. |
| Warensjö et al. 2008 | Sweden    | 50        | M: 1885   | 30.7 | 1012 | Cholesteryl esters | GC          | Healthy   | Per 1-SD                                                             | 1.03 (0.97, 1.10)                                                                                     | Total cholesterol, BMI, smoking, physical activity, and hypertension.                                                                                                                                                                                                                                                             |
| Miura et al. 2016    | Australia | 20–69     | M/F: 1008 | 17   | 179  | Phospholipids      | GC          | Healthy   | NR<br><br>Per 1-SD                                                   | 1<br>0.97 (0.67-1.42)<br>0.90 (0.62-1.30)<br>0.86 (0.72-1.01)                                         | Age, sex, smoking status, blood cholesterol, jaundice measure (proxy serum $\beta$ -carotene level), and history of serious medical condition.                                                                                                                                                                                    |

|                      |              |      |               |      |       |                   |             |           |                                                                  |                                                                                   |                                                                                                                                                                                                                                                                                                       |
|----------------------|--------------|------|---------------|------|-------|-------------------|-------------|-----------|------------------------------------------------------------------|-----------------------------------------------------------------------------------|-------------------------------------------------------------------------------------------------------------------------------------------------------------------------------------------------------------------------------------------------------------------------------------------------------|
| Pottala et al. 2010  | US           | >55  | M/F:<br>956   | 5.9  | 237   | Whole blood       | GC          | Unhealthy | Per 1%                                                           | 0.90 (0.51–1.58)                                                                  | Unadjusted                                                                                                                                                                                                                                                                                            |
| Iggman et al. 2016   | Sweden       | 71   | M: 853        | 14.8 | 605   | Adipose tissue    | GC          | Healthy   | Per 1-SD                                                         | 0.96 (0.87-1.06)                                                                  | Age, analysis occasion, smoking, body mass index, alcohol intake, physical activity, diabetes prevalence, systolic blood pressure, dyslipidemia, and hypertension treatment.                                                                                                                          |
| Kleber et al. 2016   | Germany      | 62   | M/F:<br>3259  | 9.9  | 975   | Erythrocytes      | GC          | Unhealthy | 0.10 %FA<br>11-13 %FA<br>>13 %FA<br>Per 1-SD                     | 1<br>0.90 (0.77-1.05)<br>0.90 (0.76-1.06)<br>0.95 (0.88-1.02)                     | Age, gender, LDL-C, HDL-C, logTG, BMI, hypertension, diabetes mellitus, smoking, alcohol intake, physical exercise and lipid lowering therapy.                                                                                                                                                        |
| Harris et al. 2018   | US           | 66   | M/F:<br>2500  | 7.3  | 350   | Erythrocytes      | GC          | Healthy   | 4.2 %FA<br>4.2-4.9 %FA<br>4.9-5.7 %FA<br>5.7-6.8 %FA<br>>6.8 %FA | 1<br>0.84 (0.58-1.21)<br>1.04 (0.72-1.50)<br>0.96 (0.67-1.39)<br>1.04 (0.73-1.47) | Age, sex, BMI, marital status, education, employment, health insurance status, regular aspirin use, alcohol consumption, smoking, METS, total to HDL cholesterol ratio, systolic BP, C-reactive protein, cholesterol medication use, history of diabetes.                                             |
| Jayanama et al. 2020 | US           | >50  | M/F:<br>4062  | 3    | 966   | Dietary intake    | Food recall | Healthy   | Per 1 g                                                          | 0.87 (0.79-0.95)                                                                  | Sex, race, educational level, marital status, employment status, smoking, energy intake, body mass index, percent fatty acids intake, study cohort, nutrition index, and frailty index.                                                                                                               |
| Lázaro et al. 2020   | Spain        | 61   | M/F:<br>944   | 3    | 108   | Phospholipids     | GC          | Unhealthy | Per 1-SD                                                         | 0.65 (0.44–0.96)                                                                  | Age, sex, history of arterial hypertension, diabetes, cerebrovascular disease, heart failure and myocardial infarction, hemoglobin, estimated glomerular filtration rate, triglycerides, total cholesterol, Killip-Kimball Class III to IV, and left ventricular ejection fraction                    |
| Harris et al. 2013   | US           | 59.5 | M/F:<br>1144  | 2    | 135   | Erythrocytes      | GC          | Unhealthy | >median vs.<br><median                                           | 1.02 (0.22-4.69)                                                                  | Age, histories of myocardial infarction and heart failure, admission heart rate, systolic blood pressure, serum creatinine level, elevated initial serum cardiac biomarker level, ST-segment depression on presenting electrocardiogram, and percutaneous coronary intervention performed in hospital |
| Harris et al. 2021   | 12 countries | 65   | M/F:<br>39502 | 16   | 13989 | Different tissues | GC          | Healthy   | NR                                                               | 1<br>0.95 (0.87–1.04)<br>0.94 (0.89–0.99)<br>0.95 (0.90–1.01)<br>0.94 (0.89–0.99) | Age, sex, race, field center, body-mass index, education, occupation, marital status, smoking, physical activity, alcohol intake, prevalent diabetes, hypertension, and dyslipidemia, self-reported general health, and the sum of circulating n-6 PUFA                                               |

Abbreviation: ES: effect size- CI: confidence interval- M: male- F: female- FFQ: food frequency questionnaire- BMI: body mass index- US: United States- RR: risk ratio- GC: gas chromatography- GLC: gas-liquid chromatography- NR: not-reported

\*Presented as mean or range

†Studies recruiting apparently healthy adults (without a prior diagnosis of cancer, CVD, or any other chronic diseases) were included in the healthy subgroup and studies that recruited individuals with at least one chronic disease were included in the unhealthy subgroup

**Supplemental Table 3:** Characteristics of included studies on the association between ALA intake (or tissue biomarkers) and CVD mortality in adults aged >18 years

| Author             | Country | Age*  | Sample size     | Follow up (years) ‡ | Cases  | Exposure                      | Exposure assessment | Health status† | Median/cutoff point                                           | RR (95%CI)                                                                                               | Adjustment                                                                                                                                                                                                                                                                                                                                                                                                                                                                                               |
|--------------------|---------|-------|-----------------|---------------------|--------|-------------------------------|---------------------|----------------|---------------------------------------------------------------|----------------------------------------------------------------------------------------------------------|----------------------------------------------------------------------------------------------------------------------------------------------------------------------------------------------------------------------------------------------------------------------------------------------------------------------------------------------------------------------------------------------------------------------------------------------------------------------------------------------------------|
| Lelli et al. 2019  | Italy   | >65   | M/F:<br>927     | 9                   | 114    | Dietary intake<br>Total serum | FFQ<br>GC           | Healthy        | NR                                                            | 1<br>0.77 (0.41-1.45)<br>0.95 (0.54-1.69)<br>0.80 (0.43-1.50)                                            | Age, sex, education, BMI, estimated glomerular filtration rate (CKD-EPI), caloric intake/body weight, smoke, hypertension, diabetes, alcohol and oleic acid consumption.                                                                                                                                                                                                                                                                                                                                 |
|                    |         |       |                 |                     |        |                               |                     |                | NR                                                            | 1<br>0.69 (0.40-1.22)<br>0.72 (0.40-1.30)<br>0.69 (0.39-1.23)                                            |                                                                                                                                                                                                                                                                                                                                                                                                                                                                                                          |
| Zhuang et al. 2019 | US      | 50-71 | M/F:<br>521,120 | 16                  | 38,747 | Dietary intake                | FFQ                 | Healthy        | NR<br><br>Per 1g                                              | 1<br>0.99 (0.95-1.03)<br>1.01 (0.97-1.05)<br>1.02 (0.97-1.06)<br>1.02 (0.97-1.07)<br>0.98 (0.94-1.03)    | Age, gender, BMI, race, education, marital status, household income, smoking, alcohol drinking, physical activity, multi-vitamin use, aspirin use, history of hypertension, history of hypercholesterolemia, perceived health condition, history of heart disease, stroke, diabetes, and cancer at baseline, hormones use for women, intake of total energy, percentages of energy intake from protein, carbohydrates and remaining fatty acids.                                                         |
| Wang et al. 2016   | US      | 40-75 | M:<br>42884     | 26                  | 3,868  | Dietary intake                | FFQ                 | Healthy        | 0.38 %E<br>0.45 %E<br>0.50 %E<br>0.56 %E<br>0.68 %E<br>Per 1g | 1<br>0.99 (0.89, 1.11)<br>0.99 (0.89, 1.10)<br>1.00 (0.89, 1.12)<br>0.97 (0.86-1.10)<br>0.92 (0.84-1.00) | Age, Caucasian, marital status, BMI, physical activity, smoking status, alcohol consumption, multivitamin use, vitamin E supplementation use, current aspirin use, family history of myocardial infarction, family history of diabetes, family history of cancer, history of hypertension, history of hypercholesterolemia, intakes of total energy, dietary cholesterol and percentage of energy intake from dietary protein, and remaining fatty acids, and menopausal status and hormone use in women |
| Wang et al. 2016   | US      | 30-55 | F:<br>83,349    | 32                  | 4000   | Dietary intake                | FFQ                 | Healthy        | 0.41 %E<br>0.48 %E<br>0.53%E<br>0.59%E<br>0.70%E<br>Per 1g    | 1<br>0.89 (0.81, 0.99)<br>0.96 (0.86, 1.06)<br>0.92 (0.82, 1.03)<br>0.90 (0.80-1.02)<br>0.98 (0.92-1.06) | Age, Caucasian, marital status, BMI, physical activity, smoking status, alcohol consumption, multivitamin use, vitamin E supplementation use, current aspirin use, family history of myocardial infarction, family history of diabetes, family history of cancer, history of hypertension, history of hypercholesterolemia, intakes of total energy, dietary cholesterol and percentage of energy intake from dietary protein, and remaining fatty acids, and menopausal status and hormone use in women |
| Jiao et al. 2019   | US      | 30-75 | M/F:<br>11264   | 11                  | 646    | Dietary intake                | FFQ                 | Unhealthy      | 0.40 %E<br>0.49 %E<br>0.58 %E<br>0.76 %E                      | 1<br>1.06 (0.85-1.32)<br>0.98 (0.76-1.26)<br>1.13 (0.85-1.51)                                            | Age, sex, survey period, ethnicity, BMI at diagnosis, physical activity, smoking status, smoking pack years, alcohol consumption, multivitamin use, current aspirin use, family history of myocardial infarction, family                                                                                                                                                                                                                                                                                 |

|                       |             |       |             |     |      |                |                             |         |                                                                      |                                                                                                       |                                                                                                                                                                                                                                                                                                                                                                                                                                                                                                                                                                  |
|-----------------------|-------------|-------|-------------|-----|------|----------------|-----------------------------|---------|----------------------------------------------------------------------|-------------------------------------------------------------------------------------------------------|------------------------------------------------------------------------------------------------------------------------------------------------------------------------------------------------------------------------------------------------------------------------------------------------------------------------------------------------------------------------------------------------------------------------------------------------------------------------------------------------------------------------------------------------------------------|
|                       |             |       |             |     |      |                |                             |         | Per 1g                                                               | 1.05 (0.87-1.27)                                                                                      | history of diabetes, history of hypercholesterolemia, history of hypertension, duration of diabetes, total energy intake, dietary cholesterol, and percentage of energy from dietary protein and remaining fatty acids.                                                                                                                                                                                                                                                                                                                                          |
| Laaksonen et al. 2005 | Finland     | 52    | M: 1551     | 15  | 78   | Dietary intake | Food record                 | Healthy | 1.1 g/d<br>1.5 g/d<br>2 g/d<br>Per 1g                                | 1<br>1.16 (0.66-2.02)<br>0.63 (0.33-1.21)<br>0.90 (0.67-1.20)                                         | Age, year of examination, smoking, alcohol consumption, adult socioeconomic status and moderate to vigorous leisure-time physical activity, plasma lipid-standardized $\alpha$ -tocopherol levels, plasma ascorbic acid, dietary total energy and energy-adjusted saturated fat and fiber intake, low-density lipoprotein cholesterol concentrations, systolic blood pressure, blood pressure medication, family history of ischemic heart disease, C-reactive protein concentrations, fasting concentrations of insulin and nonesterified fatty acids, and BMI. |
|                       |             |       |             |     |      | Total serum    | GC                          |         | 0.6 %FA<br>0.8 %FA<br>1 %FA                                          | 1<br>0.66 (0.34-1.28)<br>1.19 (0.63-2.26)                                                             |                                                                                                                                                                                                                                                                                                                                                                                                                                                                                                                                                                  |
| Oomen et al. 2001     | Netherlands | 64–84 | M: 667      | 10  | 49   | Dietary intake | Cross-check dietary history | Healthy | <0.45 %E<br>0.45-0.58 %E<br>>0.58 %E<br>Per 1g                       | 1<br>0.99 (0.43-2.28)<br>1.59 (0.62-4.08)<br>1.19 (0.69-2.05)                                         | Age, BMI, ex-smoking, current smoking, alcohol intake, use of vitamin supplements, intake of saturated fatty acids, trans fatty acids, linoleic acid, eicosapentaenoic and docosahexaenoic acids, other cis unsaturated fatty acids, and protein (as a percentage of energy); and intake of energy, dietary cholesterol, fiber, vitamin E, vitamin C, and $\beta$ -carotene                                                                                                                                                                                      |
| Fretts et al. 2014    | US          | >65   | M/F: 2583   | 12  | 519  | Dietary intake | FFQ                         | Healthy | 0.42 %E<br>0.47 %E<br>0.51 %E<br>0.55 %E<br>0.63 %E<br>Per 1g        | 1<br>0.93 (0.68-1.25)<br>0.83 (0.61-1.14)<br>0.97 (0.72-1.31)<br>0.96 (0.71-1.32)<br>0.94 (0.76-1.16) | Age, sex, total energy intake, race, enrolment site, education, smoking status, diabetes, BMI, alcohol consumption and treated hypertension.                                                                                                                                                                                                                                                                                                                                                                                                                     |
|                       |             |       |             |     |      | Phospholipids  | GC                          |         | 0.09 %FA<br>0.12 %FA<br>0.14 %FA<br>0.17 %FA<br>0.22 %FA<br>Per 1-SD | 1<br>1.15 (0.87-1.53)<br>1.08 (0.81-1.44)<br>1.05 (0.79-1.40)<br>1.02 (0.77-1.36)<br>1.01 (0.89-1.14) |                                                                                                                                                                                                                                                                                                                                                                                                                                                                                                                                                                  |
| Zhuang et al. 2019    | US          | >20   | M/F: 36,032 | 9   | 1299 | Dietary intake | Food recall                 | Healthy | 0-0.70 g/d<br>0.70-1.15 g/d<br>1.15-1.80 g/d<br>>1.80 g/d<br>Per 1g  | 1<br>1.07 (0.88, 1.30)<br>0.97 (0.78, 1.21)<br>0.87 (0.62-1.22)<br>0.96 (0.84, 1.09)                  | Age, gender, race-ethnicity, BMI, education, marital status, physical activity, smoking, alcohol drinking status, history of hypertension, history of diabetes, family history of cardiovascular disease, intake of total energy, vegetables, fruits, red meat and saturated fat.                                                                                                                                                                                                                                                                                |
| Sala-Vila et al. 2016 | Spanish     | 55-80 | M/F: 7202   | 5.9 | 104  | Dietary intake | FFQ                         | Healthy | <0.7 %E<br>>0.7 %E                                                   | 1<br>0.95 (0.57-1.56)                                                                                 | Age, sex, intervention group, body mass index, smoking status, physical activity, total energy intake, history of                                                                                                                                                                                                                                                                                                                                                                                                                                                |

|                      |                           |       |                 |      |       |                |             |         |                                                                                               |                                                                                                       |                                                                                                                                                                                                                                                                                                                                                                                                                                                                                                                                                                                               |
|----------------------|---------------------------|-------|-----------------|------|-------|----------------|-------------|---------|-----------------------------------------------------------------------------------------------|-------------------------------------------------------------------------------------------------------|-----------------------------------------------------------------------------------------------------------------------------------------------------------------------------------------------------------------------------------------------------------------------------------------------------------------------------------------------------------------------------------------------------------------------------------------------------------------------------------------------------------------------------------------------------------------------------------------------|
|                      |                           |       |                 |      |       |                |             |         |                                                                                               |                                                                                                       | diabetes, history of hyperlipidemia, history of hypertension, alcohol intake, and dietary factors (fiber, vegetables, fruits, and red meat).                                                                                                                                                                                                                                                                                                                                                                                                                                                  |
| Pietinen et al. 1997 | Finnish                   | 50-69 | M/F:<br>21,930  | 6.1  | 635   | Dietary intake | FFQ         | Healthy | 0.9 g/d<br>1.2 g/d<br>1.5 g/d<br>1.9 g/d<br>2.5 g/d<br>Per 1g                                 | 1<br>0.94 (0.74-1.20)<br>0.98(0.77-1.25)<br>1.03(0.81-1.32)<br>0.99 (0.76-1.28)<br>1.00 (0.91-1.11)   | Age, treatment group, smoking, body mass index, blood pressure, intakes of energy, alcohol, and fiber, education, and physical activity.                                                                                                                                                                                                                                                                                                                                                                                                                                                      |
| Dolecek et al. 1991  | US                        | 35-57 | M:<br>12,866    | 8    | 232   | Dietary intake | Food recall | Healthy | 0.87 g/d<br>1.27 g/d<br>1.57 g/d<br>1.92 g/d<br>2.8 g/d<br>Per 1g                             | 1<br>0.89 (0.62-1.29)<br>0.65 (0.43-0.97)<br>0.84 (0.58-1.22)<br>0.60 (0.39-0.91)<br>0.85 (0.74-0.97) | Unadjusted                                                                                                                                                                                                                                                                                                                                                                                                                                                                                                                                                                                    |
| Bork et al. 2016     | Denmark                   | 50-64 | M/F:<br>25,782  | 17   | 417   | Dietary intake | FFQ         | Healthy | <1.67 g/d<br>1.67-1.94 g/d<br>1.94-2.19 g/d<br>2.19-2.54 g/d<br>>2.54 g/d<br>Per 1g           | 1<br>1.01 (0.72-1.42)<br>1.25 (0.90-1.76)<br>1.22 (0.86-1.73)<br>0.71 (0.47-1.08)<br>1.01 (0.89-1.14) | BMI, waist circumference, smoking, physical activity, alcohol consumption, length of education and, for women, menopausal status and use of hormone replacement therapy, self-reported history of hypercholesterolemia and/or use of lipid-lowering medication; self-reported history of hypertension and/or use of antihypertensive medication, and self-reported history of diabetes mellitus, total energy-intake, dietary intake of fiber; glycaemic load, dietary intake of monounsaturated fatty acids, linoleic acid, saturated fatty acids, and marine long-chain omega-3 fatty acids |
|                      |                           |       |                 |      |       | Adipose tissue | GC          |         | 0.31-0.73 %FA<br>0.73-0.82 %FA<br>0.82-0.90 %FA<br>0.90-1.00 %FA<br>1.00-1.81 %FA<br>Per 1-SD | 1<br>1.20 (0.76-1.91)<br>1.12 (0.69-1.82)<br>2.16 (1.29-3.62)<br>2.40 (1.35-4.28)<br>1.10 (1.02-1.18) |                                                                                                                                                                                                                                                                                                                                                                                                                                                                                                                                                                                               |
| Koh et al. 2013      | China                     | 45-74 | M/F:<br>63,257  | 14   | 4780  | Dietary intake | FFQ         | Healthy | 0.40 g/d<br>0.51 g/d<br>0.56 g/d<br>0.80 g/d<br>Per 1g                                        | 1<br>0.94 (0.86-1.02)<br>0.87 (0.79-0.95)<br>0.81 (0.73-0.90)<br>0.79 (0.70-0.89)                     | Age, sex, dialect, year of interview, educational level, BMI, physical activity, smoking status, alcohol use, baseline history of self-reported diabetes, hypertension, coronary heart disease, stroke, total energy, intakes of protein, dietary fibre, monounsaturated fat, saturated fat, omega-6 fatty acids, and alternate omega-3 fatty acids.                                                                                                                                                                                                                                          |
| Sadowa et al. 2014   | US and European countries | 37-67 | M/F:<br>237,714 | 4-10 | 1,751 | Dietary intake | FFQ         | Healthy | <1.09 g/d<br>>1.09 g/d<br>Per 1g                                                              | 1<br>0.99 (0.85-1.17)<br>0.88 (0.68-1.14)                                                             | Age, smoking habits, BMI, physical activity, educational level, history of hypertension, alcohol intake, total energy intake (where alcohol is excluded), fibre intake, monounsaturated fatty acid, saturated fatty acid, trans fatty acids, long-chain n-3 fatty acids, and linoleic acid intake.                                                                                                                                                                                                                                                                                            |
| Rhee et al. 2017     | US                        | >45   | F:<br>39,876    | 22   | 501   | Dietary intake | FFQ         | Healthy | 0.74 %E<br>0.88 %E<br>0.99 %E<br>1.12 %E                                                      | 1<br>0.86 (0.65-1.15)<br>0.86 (0.65-1.15)<br>0.83 (0.62-1.11)                                         | randomized treatment, age, BMI, smoking, alcohol intake, physical activity, oral contraceptive use, hormone replacement therapy, multivitamin use, family history of myocardial infarction, and baseline history of                                                                                                                                                                                                                                                                                                                                                                           |



|                                 |             |       |           |      |     |                    |    |           |                                                     |                                                               |                                                                                                                                                                                                                                                                                                                                                               |
|---------------------------------|-------------|-------|-----------|------|-----|--------------------|----|-----------|-----------------------------------------------------|---------------------------------------------------------------|---------------------------------------------------------------------------------------------------------------------------------------------------------------------------------------------------------------------------------------------------------------------------------------------------------------------------------------------------------------|
|                                 |             |       |           |      |     |                    |    |           | 1.36 %E<br>Per 1g                                   | 0.88 (0.65-1.18)<br>0.94 (0.85-1.04)                          | hypertension, high cholesterol, and diabetes, intakes of dietary fiber, fruits and vegetables, trans fat, ratio of polyunsaturated to saturated fat, and sodium.                                                                                                                                                                                              |
| Erkkila et al. 2003             | French      | 33-74 | M/F: 398  | 5    | 18  | Cholesteryl esters | GC | Unhealthy | <0.77 %FA<br>0.77-0.89 %FA<br>>0.89 %FA<br>Per 1-SD | 1<br>1.12 (0.33-3.82)<br>0.44 (0.10-1.93)<br>0.97 (0.86-1.08) | Age, sex, diagnostic category, energy intake, serum cholesterol, serum triacylglycerol, diabetes (diagnosis or plasma glucose concentration>7 mmol/L), BMI, and education.                                                                                                                                                                                    |
| Harris et al. 2017              | US          | 65-80 | F: 6501   | 15.9 | 617 | Erythrocytes       | GC | Healthy   | Per 1-SD                                            | 0.97 (0.84-1.12)                                              | Age, race, HT assignment, BMI, highest education, smoking pack-year, physical activity, weekly alcohol intake, waist circumference, region, family history of cancer, family history of CVD, aspirin use, high cholesterol requiring pills (ever), and a history of hypertension, diabetes, cardiovascular disease and/or cancer.                             |
| Warensjö et al. 2008            | Sweden      | 50    | M: 1885   | 30.7 | 461 | Cholesteryl esters | GC | Healthy   | Per 1-SD                                            | 1.10 (1.00-1.21)                                              | Total cholesterol, BMI, smoking, physical activity, and hypertension.                                                                                                                                                                                                                                                                                         |
| De Goede et al. 2013 (MORGEN)   | Netherlands | 20-59 | M/F: 444  | 12.5 | 222 | Cholesteryl esters | GC | Healthy   | Per 1-SD                                            | 0.93 (0.72-1.19)                                              | Age, gender, smoking, BMI, education level, alcohol intake, systolic blood pressure, total cholesterol.                                                                                                                                                                                                                                                       |
| De Goede et al. 2013 (MP-CVDRF) | Netherlands | 20-65 | M/F: 114  | 12.5 | 57  | Cholesteryl esters | GC | Healthy   | Per 1-SD                                            | 1.01 (0.61-1.70)                                              | Age, gender, smoking, BMI, education level, alcohol intake, systolic blood pressure, total cholesterol.                                                                                                                                                                                                                                                       |
| Del Gobbo et al. 2016 (HPFS)    | US          | 64    | M: 1291   | 15   | 123 | Total plasma       | GC | Healthy   | 0.36<br>NR<br>NR<br>NR<br>0.88<br>Per 1-SD          | 1<br>NR<br>NR<br>NR<br>1.24 (0.46-3.32)<br>1.42 (0.37-5.46)   | Age, sex, race, clinical center, BMI, educational level, smoking, physical activity, alcohol intake, diabetes mellitus, treated hypertension, treated hypercholesterolemia, regular aspirin use, and biomarker concentrations of $\omega$ -6 PUFA linoleic acid (LA; 18:2 $\omega$ -6), arachidonic acid (AA; 20:4 $\omega$ -6), and total trans fatty acids. |
| Del Gobbo et al. 2016 (KIHD)    | Finland     | 52.4  | M: 1837   | 27.8 | 168 | Total plasma       | GC | Healthy   | 0.47<br>NR<br>NR<br>NR<br>1.04<br>Per 1-SD          | 1<br>NR<br>NR<br>NR<br>0.50 (0.28-0.88)<br>0.75 (0.62-0.91)   | Age, sex, race, clinical center, BMI, educational level, smoking, physical activity, alcohol intake, diabetes mellitus, treated hypertension, treated hypercholesterolemia, regular aspirin use, and biomarker concentrations of $\omega$ -6 PUFA linoleic acid (LA; 18:2 $\omega$ -6), arachidonic acid (AA; 20:4 $\omega$ -6), and total trans fatty acids. |
| Del Gobbo et al. 2016 (SCHS)    | Singapore   | 66.2  | M/F: 1555 | 14.4 | 292 | Total plasma       | GC | Healthy   | 0.18<br>NR<br>NR<br>NR<br>0.55<br>Per 1-SD          | 1<br>NR<br>NR<br>NR<br>0.72 (0.41-1.25)<br>0.70 (0.26-1.86)   | Age, sex, race, clinical center, BMI, educational level, smoking, physical activity, alcohol intake, diabetes mellitus, treated hypertension, treated hypercholesterolemia, regular aspirin use, and biomarker concentrations of $\omega$ -6 PUFA linoleic acid (LA; 18:2 $\omega$ -6), arachidonic acid (AA; 20:4 $\omega$ -6), and total trans fatty acids. |

|                                      |           |      |           |      |     |               |    |         |                                            |                                                              |                                                                                                                                                                                                                                                                                                                                                               |
|--------------------------------------|-----------|------|-----------|------|-----|---------------|----|---------|--------------------------------------------|--------------------------------------------------------------|---------------------------------------------------------------------------------------------------------------------------------------------------------------------------------------------------------------------------------------------------------------------------------------------------------------------------------------------------------------|
| Del Gobbo et al. 2016 (NHHS)         | US        | 59.9 | F: 603    | 16   | 57  | Total plasma  | GC | Healthy | 0.16<br>NR<br>NR<br>NR<br>0.64<br>Per 1-SD | 1<br>NR<br>NR<br>NR<br>0.21 (0.01-3.27)<br>0.75 (0.37-1.55)  | Age, sex, race, clinical center, BMI, educational level, smoking, physical activity, alcohol intake, diabetes mellitus, treated hypertension, treated hypercholesterolemia, regular aspirin use, and biomarker concentrations of $\omega$ -6 PUFA linoleic acid (LA; 18:2 $\omega$ -6), arachidonic acid (AA; 20:4 $\omega$ -6), and total trans fatty acids. |
| Del Gobbo et al. 2016 (CHS)          | US        | 74.4 | M/F: 3491 | 21.6 | 516 | Phospholipids | GC | Healthy | 0.09<br>NR<br>NR<br>NR<br>0.22<br>Per 1-SD | 1<br>NR<br>NR<br>NR<br>0.77 (0.56-1.06)<br>0.84 (0.76, 0.93) | Age, sex, race, clinical center, BMI, educational level, smoking, physical activity, alcohol intake, diabetes mellitus, treated hypertension, treated hypercholesterolemia, regular aspirin use, and biomarker concentrations of $\omega$ -6 PUFA linoleic acid (LA; 18:2 $\omega$ -6), arachidonic acid (AA; 20:4 $\omega$ -6), and total trans fatty acids. |
| Del Gobbo et al. 2016 (NSHDS II)     | Sweden    | 53.6 | M/F: 759  | NR   | 80  | Phospholipids | GC | Healthy | 0.13<br>NR<br>NR<br>NR<br>0.31<br>Per 1-SD | 1<br>NR<br>NR<br>NR<br>3.19 (0.63-16.24)<br>1.39 (0.87-2.22) | Age, sex, race, clinical center, BMI, educational level, smoking, physical activity, alcohol intake, diabetes mellitus, treated hypertension, treated hypercholesterolemia, regular aspirin use, and biomarker concentrations of $\omega$ -6 PUFA linoleic acid (LA; 18:2 $\omega$ -6), arachidonic acid (AA; 20:4 $\omega$ -6), and total trans fatty acids. |
| Del Gobbo et al. 2016 (PHS)          | US        | 71   | M: 832    | NR   | 167 | Phospholipids | GC | Healthy | 0.12<br>NR<br>NR<br>NR<br>0.25<br>Per 1-SD | 1<br>NR<br>NR<br>NR<br>2.51 (0.89-7.09)<br>1.21 (0.87-1.69)  | Age, sex, race, clinical center, BMI, educational level, smoking, physical activity, alcohol intake, diabetes mellitus, treated hypertension, treated hypercholesterolemia, regular aspirin use, and biomarker concentrations of $\omega$ -6 PUFA linoleic acid (LA; 18:2 $\omega$ -6), arachidonic acid (AA; 20:4 $\omega$ -6), and total trans fatty acids. |
| Del Gobbo et al. 2016 (EPIC-Norfolk) | UK        | 62.7 | M/F: 5105 | 16.1 | 507 | Phospholipids | GC | Healthy | 0.14<br>NR<br>NR<br>NR<br>0.34<br>Per 1-SD | 1<br>NR<br>NR<br>NR<br>0.76 (0.55-1.06)<br>0.92 (0.83-1.02)  | Age, sex, race, clinical center, BMI, educational level, smoking, physical activity, alcohol intake, diabetes mellitus, treated hypertension, treated hypercholesterolemia, regular aspirin use, and biomarker concentrations of $\omega$ -6 PUFA linoleic acid (LA; 18:2 $\omega$ -6), arachidonic acid (AA; 20:4 $\omega$ -6), and total trans fatty acids. |
| Del Gobbo et al. 2016 (MCCS)         | Australia | 56.1 | M/F: 5278 | 16.2 | 391 | Phospholipids | GC | Healthy | 0.09<br>NR<br>NR<br>NR<br>0.27<br>Per 1-SD | 1<br>NR<br>NR<br>NR<br>0.60 (0.37-0.97)<br>0.86 (0.72-1.02)  | Age, sex, race, clinical center, BMI, educational level, smoking, physical activity, alcohol intake, diabetes mellitus, treated hypertension, treated hypercholesterolemia, regular aspirin use, and biomarker concentrations of $\omega$ -6 PUFA linoleic acid (LA; 18:2 $\omega$ -6), arachidonic acid (AA; 20:4 $\omega$ -6), and total trans fatty acids. |

|                                  |              |      |            |      |      |                    |    |           |                                                                  |                                                                                   |                                                                                                                                                                                                                                                                                                                                                               |
|----------------------------------|--------------|------|------------|------|------|--------------------|----|-----------|------------------------------------------------------------------|-----------------------------------------------------------------------------------|---------------------------------------------------------------------------------------------------------------------------------------------------------------------------------------------------------------------------------------------------------------------------------------------------------------------------------------------------------------|
| Del Gobbo et al. 2016 (MESA)     | US           | 61.5 | M/F: 2856  | 10.9 | 47   | Phospholipids      | GC | Healthy   | 0.10<br>NR<br>NR<br>NR<br>0.27<br>Per 1-SD                       | 1<br>NR<br>NR<br>NR<br>0.23 (0.06-0.96)<br>0.85 (0.74-0.98)                       | Age, sex, race, clinical center, BMI, educational level, smoking, physical activity, alcohol intake, diabetes mellitus, treated hypertension, treated hypercholesterolemia, regular aspirin use, and biomarker concentrations of $\omega$ -6 PUFA linoleic acid (LA; 18:2 $\omega$ -6), arachidonic acid (AA; 20:4 $\omega$ -6), and total trans fatty acids. |
| Del Gobbo et al. 2016 (ULSAM 70) | Sweden       | 71   | M: 763     | 20   | 74   | Adipose tissue     | GC | Healthy   | 0.76<br>NR<br>NR<br>NR<br>1.32<br>Per 1-SD                       | 1<br>NR<br>NR<br>NR<br>1.08 (0.50-2.33)<br>1.03 (0.58-1.82)                       | Age, sex, race, clinical center, BMI, educational level, smoking, physical activity, alcohol intake, diabetes mellitus, treated hypertension, treated hypercholesterolemia, regular aspirin use, and biomarker concentrations of $\omega$ -6 PUFA linoleic acid (LA; 18:2 $\omega$ -6), arachidonic acid (AA; 20:4 $\omega$ -6), and total trans fatty acids. |
| Del Gobbo et al. 2016 (ULSAM 50) | Sweden       | 49.7 | M: 1992    | 42   | 275  | Cholesteryl esters | GC | Healthy   | 0.48<br>NR<br>NR<br>NR<br>0.87<br>Per 1-SD                       | 1<br>NR<br>NR<br>NR<br>1.16 (0.83-1.62)<br>1.02 (0.92-1.13)                       | Age, sex, race, clinical center, BMI, educational level, smoking, physical activity, alcohol intake, diabetes mellitus, treated hypertension, treated hypercholesterolemia, regular aspirin use, and biomarker concentrations of $\omega$ -6 PUFA linoleic acid (LA; 18:2 $\omega$ -6), arachidonic acid (AA; 20:4 $\omega$ -6), and total trans fatty acids. |
| Iggman et al. 2016               | Sweden       | 71   | M: 853     | 14.8 | 251  | Adipose tissue     | GC | Healthy   | Per 1-SD                                                         | 0.99 (0.85-1.16)                                                                  | Age, analysis occasion, smoking, body mass index, alcohol intake, physical activity, diabetes prevalence, systolic blood pressure, dyslipidemia, and hypertension treatment.                                                                                                                                                                                  |
| Kleber et al. 2016               | Germany      | 62   | M/F: 3259  | 9.9  | 614  | Erythrocytes       | GC | Unhealthy | 0.10 %FA<br>11-13 %FA<br>>13 %FA                                 | 1<br>0.89 (0.73-1.08)<br>0.95 (0.77-1.17)                                         | Age, gender, LDL-C, HDL-C, logTG, BMI, hypertension, diabetes mellitus, smoking, alcohol intake, physical exercise and lipid lowering therapy.                                                                                                                                                                                                                |
| Harris et al. 2018               | US           | 66   | 2500       | 7.3  | 58   | Erythrocytes       | GC | Healthy   | 4.2 %FA<br>4.2-4.9 %FA<br>4.9-5.7 %FA<br>5.7-6.8 %FA<br>>6.8 %FA | 1<br>1.76 (0.62-4.93)<br>1.79 (0.59-5.44)<br>3.06 (1.09-8.60)<br>1.78 (0.62-5.06) | Age, sex, BMI, marital status, education, employment, health insurance status, regular aspirin use, alcohol consumption, smoking, METS, total to HDL cholesterol ratio, systolic BP, C-reactive protein, cholesterol medication use, history of diabetes.                                                                                                     |
| Harris et al. 2021               | 12 countries | 65   | M/F: 38148 | 16   | 3963 | Different tissues  | GC | Healthy   | NR                                                               | 1<br>0.95 (0.87-1.04)<br>1.00 (0.91-1.10)<br>0.99 (0.91-1.09)<br>0.98 (0.89-1.08) | Age, sex, race, field center, body-mass index, education, occupation, marital status, smoking, physical activity, alcohol intake, prevalent diabetes, hypertension, and dyslipidemia, self-reported general health, and the sum of circulating n-6 PUFA                                                                                                       |

Abbreviation: ALA:  $\alpha$ -linolenic acid- ES: effect size- CI: confidence interval- M: male- F: female- FFQ: food frequency questionnaire- BMI: body mass index- US: United States- RR: risk ratio- GC: gas chromatography- GLC: gas-liquid chromatography- NR: not-reported- CVD: cardiovascular disease

\*Presented as mean or range

†Studies recruiting apparently healthy adults (without a prior diagnosis of cancer, CVD, or any other chronic diseases) were included in the healthy subgroup and studies that recruited individuals with at least one chronic disease were included in the unhealthy subgroup

**Supplemental Table 4:** Characteristics of included studies on the association between ALA intake (or tissue biomarkers) and CHD mortality in adults aged >18 years

| Author                | Country                   | Age*  | Sample size     | Follow up (years) ‡ | Cases | Exposure       | Exposure assessment         | Health status† | Median/cutoff point                                                 | RR (95%CI)                                                                                            | Adjustment                                                                                                                                                                                                                                                                                                                                                                  |
|-----------------------|---------------------------|-------|-----------------|---------------------|-------|----------------|-----------------------------|----------------|---------------------------------------------------------------------|-------------------------------------------------------------------------------------------------------|-----------------------------------------------------------------------------------------------------------------------------------------------------------------------------------------------------------------------------------------------------------------------------------------------------------------------------------------------------------------------------|
| Oomen et al. 2001     | Netherlands               | 64-84 | M: 667          | 10                  | 49    | Dietary intake | Cross-check dietary history | Healthy        | <0.45 %E<br>0.45-0.58 %E<br>>0.58 %E<br>Per 1g                      | 1<br>0.99 (0.43-2.28)<br>1.59 (0.62-4.08)<br>1.19 (0.69-2.05)                                         | Age, BMI, ex-smoking, current smoking, alcohol intake, use of vitamin supplements, intake of saturated fatty acids, trans fatty acids, linoleic acid, eicosapentaenoic and docosahexaenoic acids, other cis unsaturated fatty acids, and protein (as a percentage of energy); and intake of energy, dietary cholesterol, fiber, vitamin E, vitamin C, and $\beta$ -carotene |
| Zhuang et al. 2019    | US                        | >20   | M/F:<br>36,032  | 9                   | 1299  | Dietary intake | Food recall                 | Healthy        | 0-0.70 g/d<br>0.70-1.15 g/d<br>1.15-1.80 g/d<br>>1.80 g/d<br>Per 1g | 1<br>1.10 (0.90, 1.33)<br>0.97 (0.77, 1.23)<br>0.98 (0.65, 1.46)<br>0.99 (0.86, 1.15)                 | Age, gender, race-ethnicity, BMI, education, marital status, physical activity, smoking, alcohol drinking status, history of hypertension, history of diabetes, family history of cardiovascular disease, intake of total energy, vegetables, fruits, red meat and saturated fat.                                                                                           |
| Sadowa et al. 2014    | US and European countries | 37-67 | M/F:<br>237,714 | 4-10                | 1,751 | Dietary intake | FFQ                         | Healthy        | <1.09 g/d<br>>1.09 g/d<br>Per 1g                                    | 1<br>0.99 (0.85-1.17)<br>0.88 (0.68-1.14)                                                             | Age, smoking habits, BMI, physical activity, educational level, history of hypertension, alcohol intake, total energy intake (where alcohol is excluded), fibre intake, monounsaturated fatty acid, saturated fatty acid, trans fatty acids, long-chain n-3 fatty acids, and linoleic acid intake.                                                                          |
| Sala-Vila et al. 2016 | Spanish                   | 55-80 | M/F:<br>7202    | 5.9                 | 104   | Dietary intake | FFQ                         | Healthy        | <0.7 %E<br>>0.7 %E                                                  | 1<br>0.75 (0.35-1.57)                                                                                 | Age, sex, intervention group, body mass index, smoking status, physical activity, total energy intake, history of diabetes, history of hyperlipidemia, history of hypertension, alcohol intake, and dietary factors (fiber, vegetables, fruits, and red meat).                                                                                                              |
| Pietinen et al. 1997  | Finnish                   | 50-69 | M/F:<br>21,930  | 6.1                 | 635   | Dietary intake | FFQ                         | Healthy        | 0.9 g/d<br>1.2 g/d<br>1.5 g/d<br>1.9 g/d<br>2.5 g/d<br>Per 1g       | 1<br>0.94 (0.74-1.20)<br>0.98(0.77-1.25)<br>1.03(0.81-1.32)<br>0.99 (0.76-1.28)<br>1.00 (0.91-1.10)   | Age, treatment group, smoking, body mass index, blood pressure, intakes of energy, alcohol, and fiber, education, and physical activity.                                                                                                                                                                                                                                    |
| Dolecek et al. 1991   | US                        | 35-57 | M:<br>12,866    | 8                   | 232   | Dietary intake | Food recall                 | Healthy        | 0.87 g/d<br>1.27 g/d<br>1.57 g/d<br>1.92 g/d<br>2.8 g/d<br>Per 1g   | 1<br>0.92 (0.60-1.41)<br>0.55 (0.34-0.91)<br>0.93 (0.60-1.42)<br>0.65 (0.40-1.04)<br>0.87 (0.74-1.02) | Unadjusted                                                                                                                                                                                                                                                                                                                                                                  |

|                      |         |       |                |    |      |                |     |         |                  |                  |                                                                                                                                                                                                                                                                                                                                                                                                                                                                                                                                                                                               |
|----------------------|---------|-------|----------------|----|------|----------------|-----|---------|------------------|------------------|-----------------------------------------------------------------------------------------------------------------------------------------------------------------------------------------------------------------------------------------------------------------------------------------------------------------------------------------------------------------------------------------------------------------------------------------------------------------------------------------------------------------------------------------------------------------------------------------------|
| Bork et al. 2016     | Denmark | 50–64 | M/F:<br>25,782 | 17 | 417  | Dietary intake | FFQ | Healthy | <1.67 g/d        | 1                | BMI, waist circumference, smoking, physical activity, alcohol consumption, length of education and, for women, menopausal status and use of hormone replacement therapy, self-reported history of hypercholesterolemia and/or use of lipid-lowering medication; self-reported history of hypertension and/or use of antihypertensive medication, and self-reported history of diabetes mellitus, total energy-intake, dietary intake of fiber; glycaemic load, dietary intake of monounsaturated fatty acids, linoleic acid, saturated fatty acids, and marine long-chain omega-3 fatty acids |
|                      |         |       |                |    |      | 1.67-1.94 g/d  |     |         | 1.01 (0.72-1.42) |                  |                                                                                                                                                                                                                                                                                                                                                                                                                                                                                                                                                                                               |
|                      |         |       |                |    |      | Adipose tissue |     |         | 1.94-2.19 g/d    | 1.25 (0.90-1.76) |                                                                                                                                                                                                                                                                                                                                                                                                                                                                                                                                                                                               |
|                      |         |       |                |    |      |                |     |         | 2.19-2.54 g/d    | 1.22 (0.86-1.73) |                                                                                                                                                                                                                                                                                                                                                                                                                                                                                                                                                                                               |
|                      |         |       |                |    |      |                |     |         | >2.54 g/d        | 0.71 (0.47-1.08) |                                                                                                                                                                                                                                                                                                                                                                                                                                                                                                                                                                                               |
|                      |         |       |                |    |      |                |     |         | Per 1g           | 1.01 (0.89-1.14) |                                                                                                                                                                                                                                                                                                                                                                                                                                                                                                                                                                                               |
|                      |         |       |                |    |      |                |     |         | 0.31-0.73 %FA    | 1                |                                                                                                                                                                                                                                                                                                                                                                                                                                                                                                                                                                                               |
|                      |         |       |                |    |      |                |     |         | 0.73-0.82 %FA    | 1.20 (0.76-1.91) |                                                                                                                                                                                                                                                                                                                                                                                                                                                                                                                                                                                               |
|                      |         |       |                |    |      |                |     |         | 0.82-0.90 %FA    | 1.12 (0.69-1.82) |                                                                                                                                                                                                                                                                                                                                                                                                                                                                                                                                                                                               |
|                      |         |       |                |    |      |                |     |         | 0.90-1.00 %FA    | 2.16 (1.29-3.62) |                                                                                                                                                                                                                                                                                                                                                                                                                                                                                                                                                                                               |
|                      |         |       |                |    |      |                |     |         | 1.00-1.81 %FA    | 2.40 (1.35-4.28) |                                                                                                                                                                                                                                                                                                                                                                                                                                                                                                                                                                                               |
|                      |         |       |                |    |      |                |     |         | Per 1-SD         | 1.10 (1.02-1.18) |                                                                                                                                                                                                                                                                                                                                                                                                                                                                                                                                                                                               |
| Koh et al. 2013      | China   | 45–74 | M/F:<br>63,257 | 14 | 4780 | Dietary intake | FFQ | Healthy | 0.40 g/d         | 1                | Age, sex, dialect, year of interview, educational level, BMI, physical activity, smoking status, alcohol use, baseline history of self-reported diabetes, hypertension, coronary heart disease, stroke, total energy, intakes of protein, dietary fibre, monounsaturated fat, saturated fat, omega-6 fatty acids, and alternate omega-3 fatty acids.                                                                                                                                                                                                                                          |
|                      |         |       |                |    |      |                |     |         | 0.51 g/d         | 1.01 (0.90–1.13) |                                                                                                                                                                                                                                                                                                                                                                                                                                                                                                                                                                                               |
|                      |         |       |                |    |      |                |     |         | 0.56 g/d         | 0.90 (0.79–1.01) |                                                                                                                                                                                                                                                                                                                                                                                                                                                                                                                                                                                               |
|                      |         |       |                |    |      |                |     |         | 0.80 g/d         | 0.82 (0.71–0.93) |                                                                                                                                                                                                                                                                                                                                                                                                                                                                                                                                                                                               |
|                      |         |       |                |    |      |                |     |         | Per 1g           | 0.82 (0.70-0.96) |                                                                                                                                                                                                                                                                                                                                                                                                                                                                                                                                                                                               |
| Fretts et al. 2014   | US      | >65   | M/F:<br>2583   | 12 | 429  | Dietary intake | FFQ | Healthy | <1.67 g/d        | 1                | Age, sex, total energy intake, race, enrolment site, education, smoking status, diabetes, BMI, alcohol consumption and treated hypertension.                                                                                                                                                                                                                                                                                                                                                                                                                                                  |
|                      |         |       |                |    |      | 1.67-1.94 g/d  |     |         | 0.89 (0.62-1.29) |                  |                                                                                                                                                                                                                                                                                                                                                                                                                                                                                                                                                                                               |
|                      |         |       |                |    |      |                |     |         | 1.94-2.19 g/d    | 0.83 (0.57-1.21) |                                                                                                                                                                                                                                                                                                                                                                                                                                                                                                                                                                                               |
|                      |         |       |                |    |      |                |     |         | 2.19-2.54 g/d    | 0.94 (0.65-1.36) |                                                                                                                                                                                                                                                                                                                                                                                                                                                                                                                                                                                               |
|                      |         |       |                |    |      |                |     |         | >2.54 g/d        | 0.85 (0.58-1.26) |                                                                                                                                                                                                                                                                                                                                                                                                                                                                                                                                                                                               |
|                      |         |       |                |    |      |                |     |         | Per 1g           | 0.89 (0.69-1.15) |                                                                                                                                                                                                                                                                                                                                                                                                                                                                                                                                                                                               |
|                      |         |       |                |    |      | Phospholipids  | GC  | Healthy | 0.31-0.73 %FA    | 1                |                                                                                                                                                                                                                                                                                                                                                                                                                                                                                                                                                                                               |
|                      |         |       |                |    |      |                |     |         |                  | 0.73-0.82 %FA    | 1.06 (0.75-1.51)                                                                                                                                                                                                                                                                                                                                                                                                                                                                                                                                                                              |
|                      |         |       |                |    |      |                |     |         | 0.82-0.90 %FA    | 1.16 (0.82-1.65) |                                                                                                                                                                                                                                                                                                                                                                                                                                                                                                                                                                                               |
|                      |         |       |                |    |      |                |     |         | 0.90-1.00 %FA    | 1.02 (0.71-1.45) |                                                                                                                                                                                                                                                                                                                                                                                                                                                                                                                                                                                               |
|                      |         |       |                |    |      |                |     |         | 1.00-1.81 %FA    | 1.03 (0.72-1.46) |                                                                                                                                                                                                                                                                                                                                                                                                                                                                                                                                                                                               |
| Ascherio et al. 1995 | US      | 40-75 | M:<br>43757    | 6  | 229  | Dietary intake | FFQ | Healthy | 0.80 g/d         | 1                | Age, BMI, smoking habits, alcohol consumption, physical activity, history of hypertension or high blood cholesterol, family history of myocardial infarction before age 60, profession, fibre and total energy intake.                                                                                                                                                                                                                                                                                                                                                                        |
|                      |         |       |                |    |      |                |     |         | 0.90 g/d         | 1.12 (0.72-1.72) |                                                                                                                                                                                                                                                                                                                                                                                                                                                                                                                                                                                               |
|                      |         |       |                |    |      |                |     |         | 1.10 g/d         | 1.02 (0.66-1.58) |                                                                                                                                                                                                                                                                                                                                                                                                                                                                                                                                                                                               |
|                      |         |       |                |    |      |                |     |         | 1.20 g/d         | 1.35 (0.90-2.03) |                                                                                                                                                                                                                                                                                                                                                                                                                                                                                                                                                                                               |
|                      |         |       |                |    |      |                |     |         | 1.50 g/d         | 1.03 (0.66-1.59) |                                                                                                                                                                                                                                                                                                                                                                                                                                                                                                                                                                                               |
|                      |         |       |                |    |      |                |     |         | Per 1g           | 1.09 (0.83-1.42) |                                                                                                                                                                                                                                                                                                                                                                                                                                                                                                                                                                                               |
| Albert et al. 2016   | US      | 30-55 | F:<br>76763    | 18 | 206  | Dietary intake | FFQ | Healthy | 0.37 %E          | 1                | Age, total energy intake, smoking status, BMI, alcohol intake, menopausal status and postmenopausal hormone use, vigorous to moderate activity, usual aspirin use, multivitamin use, vitamin E supplement use, history of hypertension, hypercholesterolemia, diabetes, family history of MI, and history of prior CVD, intakes of trans-                                                                                                                                                                                                                                                     |
|                      |         |       |                |    |      |                |     |         | 0.45 %E          | 0.86 (0.57–1.29) |                                                                                                                                                                                                                                                                                                                                                                                                                                                                                                                                                                                               |
|                      |         |       |                |    |      |                |     |         | 0.52 %E          | 0.76 (0.50–1.16) |                                                                                                                                                                                                                                                                                                                                                                                                                                                                                                                                                                                               |
|                      |         |       |                |    |      |                |     |         | 0.60 %E          | 0.62 (0.39–0.98) |                                                                                                                                                                                                                                                                                                                                                                                                                                                                                                                                                                                               |
|                      |         |       |                |    |      |                |     |         | 0.74 %E          | 0.60 (0.37-0.96) |                                                                                                                                                                                                                                                                                                                                                                                                                                                                                                                                                                                               |
|                      |         |       |                |    |      |                |     |         | Per 1g           | 0.51 (0.29-0.89) |                                                                                                                                                                                                                                                                                                                                                                                                                                                                                                                                                                                               |

|                                  |           |       |           |      |     |                    |    |           |                                                               |                                                                                                       |                                                                                                                                                                                                                                                                                                                                     |
|----------------------------------|-----------|-------|-----------|------|-----|--------------------|----|-----------|---------------------------------------------------------------|-------------------------------------------------------------------------------------------------------|-------------------------------------------------------------------------------------------------------------------------------------------------------------------------------------------------------------------------------------------------------------------------------------------------------------------------------------|
|                                  |           |       |           |      | 641 |                    |    |           | 0.37 %E<br>0.45 %E<br>0.52 %E<br>0.60 %E<br>0.74 %E<br>Per 1g | 1<br>1.13 (0.89–1.43)<br>0.92 (0.71–1.18)<br>0.96 (0.74–1.25)<br>1.01 (0.77-1.33)<br>0.97 (0.69-1.36) | unsaturated fat, ratio of polyunsaturated fat to saturated fat, and omega-3 fatty acids.                                                                                                                                                                                                                                            |
| Erkkila et al. 2003              | French    | 33-74 | M/F: 398  | 5    | 18  | Cholesteryl esters | GC | Unhealthy | <0.77 %FA<br>0.77-0.89 %FA<br>>0.89 %FA<br>Per 1-SD           | 1<br>1.12 (0.33-3.82)<br>0.44 (0.10-1.93)<br>0.97 (0.86-1.08)                                         | Age, sex, diagnostic category, energy intake, serum cholesterol, serum triacylglycerol, diabetes (diagnosis or plasma glucose concentration>7 mmol/L), BMI, and education.                                                                                                                                                          |
| Del Gobbo et al. 2016 (HPFS)     | US        | 64    | M: 1291   | 15   | 123 | Total plasma       | GC | Healthy   | 0.36<br>NR<br>NR<br>NR<br>0.88<br>Per 1-SD                    | 1<br>NR<br>NR<br>NR<br>NR<br>1.24 (0.46-3.32)<br>1.42 (0.37-5.46)                                     | Age, sex, race, clinical center, BMI, educational level, smoking, physical activity, alcohol intake, diabetes mellitus, treated hypertension, treated hypercholesterolemia, regular aspirin use, and biomarker concentrations of ω-6 PUFA linoleic acid (LA; 18:2ω-6), arachidonic acid (AA; 20:4ω-6), and total trans fatty acids. |
| Del Gobbo et al. 2016 (KIHD)     | Finland   | 52.4  | M: 1837   | 27.8 | 168 | Total plasma       | GC | Healthy   | 0.47<br>NR<br>NR<br>NR<br>1.04<br>Per 1-SD                    | 1<br>NR<br>NR<br>NR<br>NR<br>0.50 (0.28-0.88)<br>0.75 (0.62-0.91)                                     | Age, sex, race, clinical center, BMI, educational level, smoking, physical activity, alcohol intake, diabetes mellitus, treated hypertension, treated hypercholesterolemia, regular aspirin use, and biomarker concentrations of ω-6 PUFA linoleic acid (LA; 18:2ω-6), arachidonic acid (AA; 20:4ω-6), and total trans fatty acids. |
| Del Gobbo et al. 2016 (SCHS)     | Singapore | 66.2  | M/F: 1555 | 14.4 | 292 | Total plasma       | GC | Healthy   | 0.18<br>NR<br>NR<br>NR<br>0.55<br>Per 1-SD                    | 1<br>NR<br>NR<br>NR<br>NR<br>0.72 (0.41-1.25)<br>0.70 (0.26-1.86)                                     | Age, sex, race, clinical center, BMI, educational level, smoking, physical activity, alcohol intake, diabetes mellitus, treated hypertension, treated hypercholesterolemia, regular aspirin use, and biomarker concentrations of ω-6 PUFA linoleic acid (LA; 18:2ω-6), arachidonic acid (AA; 20:4ω-6), and total trans fatty acids. |
| Del Gobbo et al. 2016 (NHHS)     | US        | 59.9  | F: 603    | 16   | 57  | Total plasma       | GC | Healthy   | 0.16<br>NR<br>NR<br>NR<br>0.64<br>Per 1-SD                    | 1<br>NR<br>NR<br>NR<br>NR<br>0.21 (0.01-3.27)<br>0.75 (0.37-1.55)                                     | Age, sex, race, clinical center, BMI, educational level, smoking, physical activity, alcohol intake, diabetes mellitus, treated hypertension, treated hypercholesterolemia, regular aspirin use, and biomarker concentrations of ω-6 PUFA linoleic acid (LA; 18:2ω-6), arachidonic acid (AA; 20:4ω-6), and total trans fatty acids. |
| Del Gobbo et al. 2016 (CHS)      | US        | 74.4  | M/F: 3491 | 21.6 | 516 | Phospholipids      | GC | Healthy   | 0.09<br>NR<br>NR<br>NR<br>0.22<br>Per 1-SD                    | 1<br>NR<br>NR<br>NR<br>NR<br>0.77 (0.56-1.06)<br>0.84 (0.76-0.93)                                     | Age, sex, race, clinical center, BMI, educational level, smoking, physical activity, alcohol intake, diabetes mellitus, treated hypertension, treated hypercholesterolemia, regular aspirin use, and biomarker concentrations of ω-6 PUFA linoleic acid (LA; 18:2ω-6), arachidonic acid (AA; 20:4ω-6), and total trans fatty acids. |
| Del Gobbo et al. 2016 (NSHDS II) | Sweden    | 53.6  | M/F: 759  | NR   | 80  | Phospholipids      | GC | Healthy   | 0.13<br>NR<br>NR                                              | 1<br>NR<br>NR                                                                                         | Age, sex, race, clinical center, BMI, educational level, smoking, physical activity, alcohol intake, diabetes mellitus, treated hypertension, treated hypercholesterolemia, regular                                                                                                                                                 |

|                                      |            |       |           |      |     |                    |    |         |                                            |                                                             |                                                                                                                                                                                                                                                                                                                                                               |
|--------------------------------------|------------|-------|-----------|------|-----|--------------------|----|---------|--------------------------------------------|-------------------------------------------------------------|---------------------------------------------------------------------------------------------------------------------------------------------------------------------------------------------------------------------------------------------------------------------------------------------------------------------------------------------------------------|
|                                      |            |       |           |      |     |                    |    |         | NR<br>0.31<br>Per 1-SD                     | NR<br>3.19 (0.63-<br>16.24)<br>1.39 (0.87-2.22)             | aspirin use, and biomarker concentrations of $\omega$ -6 PUFA linoleic acid (LA; 18:2 $\omega$ -6), arachidonic acid (AA; 20:4 $\omega$ -6), and total trans fatty acids.                                                                                                                                                                                     |
| Del Gobbo et al. 2016 (PHS)          | US         | 71    | M: 832    | NR   | 167 | Phospholipids      | GC | Healthy | 0.12<br>NR<br>NR<br>NR<br>0.25<br>Per 1-SD | 1<br>NR<br>NR<br>NR<br>2.51 (0.89-7.09)<br>1.21 (0.87-1.69) | Age, sex, race, clinical center, BMI, educational level, smoking, physical activity, alcohol intake, diabetes mellitus, treated hypertension, treated hypercholesterolemia, regular aspirin use, and biomarker concentrations of $\omega$ -6 PUFA linoleic acid (LA; 18:2 $\omega$ -6), arachidonic acid (AA; 20:4 $\omega$ -6), and total trans fatty acids. |
| Del Gobbo et al. 2016 (EPIC-Norfolk) | UK         | 62.7  | M/F: 5105 | 16.1 | 507 | Phospholipids      | GC | Healthy | 0.14<br>NR<br>NR<br>NR<br>0.34<br>Per 1-SD | 1<br>NR<br>NR<br>NR<br>0.76 (0.55-1.06)<br>0.92 (0.83-1.02) | Age, sex, race, clinical center, BMI, educational level, smoking, physical activity, alcohol intake, diabetes mellitus, treated hypertension, treated hypercholesterolemia, regular aspirin use, and biomarker concentrations of $\omega$ -6 PUFA linoleic acid (LA; 18:2 $\omega$ -6), arachidonic acid (AA; 20:4 $\omega$ -6), and total trans fatty acids. |
| Del Gobbo et al. 2016 (MCCS)         | Australia  | 56.1  | M/F: 5278 | 16.2 | 391 | Phospholipids      | GC | Healthy | 0.09<br>NR<br>NR<br>NR<br>0.27<br>Per 1-SD | 1<br>NR<br>NR<br>NR<br>0.60 (0.37-0.97)<br>0.86 (0.72-1.02) | Age, sex, race, clinical center, BMI, educational level, smoking, physical activity, alcohol intake, diabetes mellitus, treated hypertension, treated hypercholesterolemia, regular aspirin use, and biomarker concentrations of $\omega$ -6 PUFA linoleic acid (LA; 18:2 $\omega$ -6), arachidonic acid (AA; 20:4 $\omega$ -6), and total trans fatty acids. |
| Del Gobbo et al. 2016 (MESA)         | US         | 61.5  | M/F: 2856 | 10.9 | 47  | Phospholipids      | GC | Healthy | 0.10<br>NR<br>NR<br>NR<br>0.27<br>Per 1-SD | 1<br>NR<br>NR<br>NR<br>0.23 (0.06-0.96)<br>0.85 (0.74-0.98) | Age, sex, race, clinical center, BMI, educational level, smoking, physical activity, alcohol intake, diabetes mellitus, treated hypertension, treated hypercholesterolemia, regular aspirin use, and biomarker concentrations of $\omega$ -6 PUFA linoleic acid (LA; 18:2 $\omega$ -6), arachidonic acid (AA; 20:4 $\omega$ -6), and total trans fatty acids. |
| Del Gobbo et al. 2016 (ULSAM 70)     | Sweden     | 71    | M: 763    | 20   | 74  | Adipose tissue     | GC | Healthy | 0.76<br>NR<br>NR<br>NR<br>1.32<br>Per 1-SD | 1<br>NR<br>NR<br>NR<br>1.08 (0.50-2.33)<br>1.03 (0.58-1.82) | Age, sex, race, clinical center, BMI, educational level, smoking, physical activity, alcohol intake, diabetes mellitus, treated hypertension, treated hypercholesterolemia, regular aspirin use, and biomarker concentrations of $\omega$ -6 PUFA linoleic acid (LA; 18:2 $\omega$ -6), arachidonic acid (AA; 20:4 $\omega$ -6), and total trans fatty acids. |
| Del Gobbo et al. 2016 (ULSAM 50)     | Sweden     | 49.7  | M: 1992   | 42   | 275 | Cholesteryl esters | GC | Healthy | 0.48<br>NR<br>NR<br>NR<br>0.87<br>Per 1-SD | 1<br>NR<br>NR<br>NR<br>1.16 (0.83-1.62)<br>1.02 (0.92-1.13) | Age, sex, race, clinical center, BMI, educational level, smoking, physical activity, alcohol intake, diabetes mellitus, treated hypertension, treated hypercholesterolemia, regular aspirin use, and biomarker concentrations of $\omega$ -6 PUFA linoleic acid (LA; 18:2 $\omega$ -6), arachidonic acid (AA; 20:4 $\omega$ -6), and total trans fatty acids. |
| De Goede et al. 2013 (MORGEN)        | Netherland | 20–59 | M/F: 444  | 12.5 | 222 | Cholesteryl esters | GC | Healthy | Per 1-SD                                   | 0.93 (0.72-1.19)                                            | Age, gender, smoking, BMI, education level, alcohol intake, systolic blood pressure, total cholesterol.                                                                                                                                                                                                                                                       |



|                                 |            |       |          |      |    |                    |    |         |          |                  |                                                                                                         |
|---------------------------------|------------|-------|----------|------|----|--------------------|----|---------|----------|------------------|---------------------------------------------------------------------------------------------------------|
| De Goede et al. 2013 (MP-CVDRF) | Netherland | 20-65 | M/F: 114 | 12.5 | 57 | Cholesteryl esters | GC | Healthy | Per 1-SD | 1.01 (0.61-1.70) | Age, gender, smoking, BMI, education level, alcohol intake, systolic blood pressure, total cholesterol. |
|---------------------------------|------------|-------|----------|------|----|--------------------|----|---------|----------|------------------|---------------------------------------------------------------------------------------------------------|

Abbreviation: ES: effect size- CI: confidence interval- M: male- F: female- FFQ: food frequency questionnaire- US: United States- UK: United Kingdom- Q: quintile or quartile- T: tertile- vs.: versus- HR: hazard ratio- OR: odds ratio- RR: risk ratio- GC: gas chromatography- NR: not-reported- CHD: coronary heart disease- ALA:  $\alpha$ -linolenic acid

\*Presented as mean or range.

†Studies recruiting apparently healthy adults (without a prior diagnosis of cancer, CVD, or any other chronic diseases) were included in the healthy subgroup and studies that recruited individuals with at least one chronic disease were included in the unhealthy subgroup

**Supplemental Table 5:** Characteristics of included studies on the association between ALA intake (or tissue biomarkers) and cancer mortality in adults aged >18 years

| Author               | Country | Age*  | Sample size  | Follow up (years) ‡ | Cases  | Exposure       | Exposure assessment | Health status† | Median/cutoff point                                                | RR (95%CI)                                                                                               | Adjustment                                                                                                                                                                                                                                                                                                                                                                                                                                                                                               |
|----------------------|---------|-------|--------------|---------------------|--------|----------------|---------------------|----------------|--------------------------------------------------------------------|----------------------------------------------------------------------------------------------------------|----------------------------------------------------------------------------------------------------------------------------------------------------------------------------------------------------------------------------------------------------------------------------------------------------------------------------------------------------------------------------------------------------------------------------------------------------------------------------------------------------------|
| Zhuang et al. 2019   | US      | 50-71 | M/F: 521,120 | 16                  | 45,783 | Dietary intake | FFQ                 | Healthy        | NR<br><br>Per 1g                                                   | 1<br>1.01 (0.98-1.04)<br>1.01 (0.97-1.05)<br>1.03 (0.99-1.08)<br>1.05 (1.00-1.10)<br>1.02 (0.98-1.05)    | Age, gender, BMI, race, education, marital status, household income, smoking, alcohol drinking, physical activity, multi-vitamin use, aspirin use, history of hypertension, history of hypercholesterolemia, perceived health condition, history of heart disease, stroke, diabetes, and cancer at baseline, hormones use for women, intake of total energy, percentages of energy intake from protein, carbohydrates and remaining fatty acids.                                                         |
| Wang et al. 2016     | US      | 40-75 | M: 42884     | 26                  | 4,192  | Dietary intake | FFQ                 | Healthy        | 0.38 %E<br>0.45 %E<br>0.50 %E<br>0.56 %E<br>0.68 %E<br>Per 1g      | 1<br>1.11 (1.00, 1.23)<br>1.10 (0.99, 1.22)<br>1.11 (0.99, 1.24)<br>1.15 (1.02-1.29)<br>1.09 (1.02-1.17) | Age, Caucasian, marital status, BMI, physical activity, smoking status, alcohol consumption, multivitamin use, vitamin E supplementation use, current aspirin use, family history of myocardial infarction, family history of diabetes, family history of cancer, history of hypertension, history of hypercholesterolemia, intakes of total energy, dietary cholesterol and percentage of energy intake from dietary protein, and remaining fatty acids, and menopausal status and hormone use in women |
| Wang et al. 2016     | US      | 30-55 | F: 83,349    | 32                  | 7,919  | Dietary intake | FFQ                 | Healthy        | 0.41 %E<br>0.48 %E<br>0.53%E<br>0.59%E<br>0.70%E<br>Per 1g         | 1<br>1.05 (0.97-1.13)<br>1.12 (1.04-1.21)<br>1.11 (1.03-1.20)<br>1.10 (1.01-1.20)<br>1.10 (1.03-1.17)    | Age, Caucasian, marital status, BMI, physical activity, smoking status, alcohol consumption, multivitamin use, vitamin E supplementation use, current aspirin use, family history of myocardial infarction, family history of diabetes, family history of cancer, history of hypertension, history of hypercholesterolemia, intakes of total energy, dietary cholesterol and percentage of energy intake from dietary protein, and remaining fatty acids, and menopausal status and hormone use in women |
| Jiao et al. 2019     | US      | 30-75 | M/F: 11264   | 11                  | 451    | Dietary intake | FFQ                 | Unhealthy      | 0.40 %E<br>0.49 %E<br>0.58 %E<br>0.76 %E<br>Per 1g                 | 1<br>1.00 (0.78, 1.29)<br>0.63 (0.46, 0.85)<br>0.75 (0.53-1.05)<br>0.80 (0.64-0.99)                      | Age, sex, survey period, ethnicity, BMI at diagnosis, physical activity, smoking status, smoking pack years, alcohol consumption, multivitamin use, current aspirin use, family history of myocardial infarction, family history of diabetes, history of hypercholesterolemia, history of hypertension, duration of diabetes, total energy intake, dietary cholesterol, and percentage of energy from dietary protein and remaining fatty acids.                                                         |
| Khankari et al. 2015 | US      | 20-98 | F: 1463      | 14.7                | 210    | Dietary intake | FFQ                 | Unhealthy      | <0.38 g/d<br>0.38-0.68 g/d<br>0.68-1.10 g/d<br>>1.10 g/d<br>Per 1g | 1<br>1.06 (0.71-1.60)<br>1.17 (0.77-1.77)<br>1.03 (0.64-1.68)<br>1.09 (0.74-1.62)                        | Age and total energy intake                                                                                                                                                                                                                                                                                                                                                                                                                                                                              |
| Epstein et al. 2012  | Sweden  | 70.7  | M: 525       | 20                  | 222    | Dietary intake | FFQ                 | Unhealthy      | NR                                                                 | 1<br>1.18 (0.82-1.69)<br>0.83 (0.56-1.23)                                                                | Age at diagnosis, family history of prostate cancer, calendar year, alcohol intake, and BMI                                                                                                                                                                                                                                                                                                                                                                                                              |

|                           |                    |       |                |      |      |                    |                        |           |                                                                     |                                                                                                       |                                                                                                                                                                                                                                                                                                                                                                                                                      |
|---------------------------|--------------------|-------|----------------|------|------|--------------------|------------------------|-----------|---------------------------------------------------------------------|-------------------------------------------------------------------------------------------------------|----------------------------------------------------------------------------------------------------------------------------------------------------------------------------------------------------------------------------------------------------------------------------------------------------------------------------------------------------------------------------------------------------------------------|
|                           |                    |       |                |      |      |                    |                        |           | Per 1g                                                              | 1.16 (0.79-1.69)<br>1.00 (0.86-1.17)                                                                  |                                                                                                                                                                                                                                                                                                                                                                                                                      |
| Zhuang et al. 2019        | US                 | >20   | M/F:<br>36,032 | 9    | 1099 | Dietary intake     | Food recall            | Healthy   | 0-0.70 g/d<br>0.70-1.15 g/d<br>1.15-1.80 g/d<br>>1.80 g/d<br>Per 1g | 1<br>0.92 (0.73, 1.15)<br>0.96 (0.74, 1.25)<br>0.89 (0.66-1.19)<br>0.95 (0.84, 1.09)                  | Age, gender, race-ethnicity, BMI, education, marital status, physical activity, smoking, alcohol drinking status, history of hypertension, history of diabetes, family history of cardiovascular disease, intake of total energy, vegetables, fruits, red meat and saturated fat.                                                                                                                                    |
| Richman et al. 2013       | US                 | 40-75 | M: 4577        | 8.4  | 315  | Dietary intake     | FFQ                    | Unhealthy | 0.36 %E<br>0.44 %E<br>0.50 %E<br>0.58 %E<br>0.74 %E                 | 1<br>1.03 (0.71-1.48)<br>1.15 (0.80-1.67)<br>0.93 (0.61-1.41)<br>0.97 (0.61-1.55)                     | Age at diagnosis, energy, time since diagnosis, treatment, Gleason sum, clinical stage, diagnostic PSA, number of PSA screening tests prior to diagnosis, body mass index, smoking, vigorous activity, and intake of calcium, alcohol, protein, saturated fat, monounsaturated fat, trans fat, linoleic acid, long-chain omega-3 fatty acids and pre-diagnostic intake of polyunsaturated fat based on the 1986 FFQ. |
| Dolecek et al. 1991       | US                 | 35-57 | M:<br>12,866   | 8    | 132  | Dietary intake     | Food recall            | Healthy   | 0.87 g/d<br>1.27 g/d<br>1.57 g/d<br>1.92 g/d<br>2.8 g/d<br>Per 1g   | 1<br>1.36 (0.81-2.26)<br>0.87 (0.49-1.55)<br>1.16 (0.68-1.96)<br>0.87 (0.49-1.55)<br>0.96 (0.79-1.16) | Unadjusted                                                                                                                                                                                                                                                                                                                                                                                                           |
| Harris et al. 2017        | US                 | 65-80 | F: 6501        | 15.9 | 462  | Erythrocytes       | GC                     | Healthy   | Per 1-SD                                                            | 0.98 (0.85-1.12)                                                                                      | Age, race, HT assignment, BMI, highest education, smoking pack-year, physical activity, weekly alcohol intake, waist circumference, region, family history of cancer, family history of CVD, aspirin use, high cholesterol requiring pills (ever), and a history of hypertension, diabetes, cardiovascular disease and/or cancer.                                                                                    |
| Simon et al. 1998         | US                 | 35-57 | M: 323         | 6.9  | 108  | Cholesteryl esters | GLC                    | Healthy   | Per 1-SD                                                            | 1.01 (0.79-1.29)                                                                                      | Age, smoking, alcohol intake, plasma cholesterol level, and diastolic blood pressure                                                                                                                                                                                                                                                                                                                                 |
| Pelser et al. 2013        | US                 | 50-71 | M:<br>288,268  | 9    | 725  | Dietary intake     | FFQ                    | Healthy   | 0.41 %E<br>0.52 %E<br>0.60 %E<br>0.70 %E<br>0.88 %E                 | 1<br>1.09 (0.86-1.38)<br>0.91 (0.71-1.16)<br>1.00 (0.78-1.27)<br>1.13 (0.89-1.43)                     | Age, race, family history of prostate cancer, education, marital status, PSA testing in the past 3 years, physical activity, smoking, self-reported diabetes, BMI, total energy intake, alcohol and intake of tomatoes.                                                                                                                                                                                              |
| Harris et al. 2018        | US                 | 66    | M/F:<br>2500   | 7.3  | 146  | Erythrocytes       | GC                     | Healthy   | 4.2 %FA<br>4.2-4.9 %FA<br>4.9-5.7 %FA<br>5.7-6.8 %FA<br>>6.8 %FA    | 1<br>0.71 (0.41-1.21)<br>1.05 (0.65-1.71)<br>0.54 (0.28-1.03)<br>0.91 (0.54, 1.53)                    | Age, sex, BMI, marital status, education, employment, health insurance status, regular aspirin use, alcohol consumption, smoking, METS, total to HDL cholesterol ratio, systolic BP, C-reactive protein, cholesterol medication use, history of diabetes.                                                                                                                                                            |
| Perez-Cornago et al. 2020 | European countries |       | M:<br>142,239  | 13.6 | 936  | Dietary intake     | FFQ and diet histories | Healthy   | Per 1-SD                                                            | 0.99 (0.90-1.09)                                                                                      | Age, educational level, smoking status, marital status, diabetes, physical activity, height, body mass index, and total energy intake                                                                                                                                                                                                                                                                                |
| Harris et al. 2021        | 12 countries       | 65    | M/F:<br>38148  | 16   | 3979 | Different tissues  | GC                     | Healthy   | NR                                                                  | 1<br>0.98 (0.89-1.08)<br>0.96 (0.87-1.05)<br>0.99 (0.90-1.09)                                         | Age, sex, race, field center, body-mass index, education, occupation, marital status, smoking, physical activity, alcohol intake, prevalent diabetes, hypertension, and dyslipidemia, self-reported general health, and the sum of circulating n-6 PUFA                                                                                                                                                              |



**Supplemental Table 6:** Extracted and calculated data for the nonlinear dose-response analysis of dietary ALA and all-cause mortality

| Author               | Category | Participations | Deaths | Median of g/d from ALA intake | RR   | LL   | UL   |
|----------------------|----------|----------------|--------|-------------------------------|------|------|------|
| Zhuang et al. 2019   | 1        | 130280         | 25,560 | 0.77                          | 1    | 1    | 1    |
|                      | 2        | 130280         | 25,042 | 0.98                          | 1.00 | 0.98 | 1.02 |
|                      | 3        | 130280         | 25,761 | 1.15                          | 1.02 | 1    | 1.05 |
|                      | 4        | 130280         | 26,113 | 1.35                          | 1.04 | 1.01 | 1.06 |
| Wang et al. 2016     | 1        | 16,669         | 4274   | 0.7                           | 1    | 1    | 1    |
|                      | 2        | 16670          | 3800   | 0.84                          | 1.00 | 0.95 | 1.04 |
|                      | 3        | 16670          | 3831   | 0.93                          | 1.05 | 1.00 | 1.10 |
|                      | 4        | 16670          | 3839   | 1.03                          | 1.02 | 0.97 | 1.07 |
|                      | 5        | 16670          | 4570   | 1.2                           | 0.98 | 0.93 | 1.04 |
| Wang et al. 2016     | 1        | 8,576          | 2398   | 0.83                          | 1    | 1    | 1    |
|                      | 2        | 8577           | 2431   | 0.99                          | 1.00 | 0.94 | 1.06 |
|                      | 3        | 8577           | 2544   | 1.15                          | 1.02 | 0.96 | 1.08 |
|                      | 4        | 8577           | 2700   | 1.24                          | 1.04 | 0.98 | 1.10 |
|                      | 5        | 8577           | 2917   | 1.49                          | 1.01 | 0.94 | 1.08 |
| Jiao et al. 2019     | 1        | 2834           | 827    | 0.69                          | 1    | 1    | 1    |
|                      | 2        | 2814           | 680    | 0.88                          | 0.98 | 0.87 | 1.09 |
|                      | 3        | 2752           | 510    | 1.04                          | 0.80 | 0.70 | 0.91 |
|                      | 4        | 2810           | 485    | 1.35                          | 0.88 | 0.76 | 1.02 |
| Khankari et al. 2015 | 1        | 365            | 114    | 0.38                          | 1    | 1    | 1    |
|                      | 2        | 366            | 129    | 0.53                          | 1.18 | 0.91 | 1.52 |
|                      | 3        | 366            | 121    | 0.89                          | 1.18 | 0.90 | 1.55 |
|                      | 4        | 366            | 121    | 1.1                           | 1.14 | 0.83 | 1.57 |
| Fretts et al. 2014   | 1        | 516            | 328    | 0.94                          | 1    | 1    | 1    |
|                      | 2        | 516            | 328    | 1.04                          | 0.98 | 0.84 | 1.15 |
|                      | 3        | 517            | 301    | 1.12                          | 0.88 | 0.75 | 1.03 |
|                      | 4        | 517            | 298    | 1.15                          | 0.86 | 0.73 | 1.02 |
|                      | 5        | 517            | 262    | 1.23                          | 0.73 | 0.61 | 0.88 |
| Zhuang et al. 2019   | 1        | 9008           | 1784   | 0.35                          | 1    | 1    | 1    |
|                      | 2        | 9008           | 1258   | 0.92                          | 0.99 | 0.89 | 1.10 |
|                      | 3        | 9008           | 1082   | 1.47                          | 0.90 | 0.78 | 1.04 |
|                      | 4        | 9008           | 702    | 2.12                          | 0.84 | 0.70 | 1.00 |
| Zhuang et al. 2019   | 1        | 3529           | 253    | 0.33                          | 1    | 1    | 1    |
|                      | 2        | 3529           | 205    | 0.83                          | 0.93 | 0.77 | 1.13 |
|                      | 3        | 3529           | 229    | 1.26                          | 0.93 | 0.76 | 1.13 |
|                      | 4        | 3530           | 320    | 1.8                           | 1.23 | 1.01 | 1.50 |
| Fortes et al. 2000   | 1        | 40             | 21     | 0.9                           | 1    | 1    | 1    |
|                      | 2        | 80             | 57     | 1.3                           | 0.74 | 0.37 | 1.50 |

|                      |   |      |     |      |      |      |      |
|----------------------|---|------|-----|------|------|------|------|
|                      | 3 | 40   | 29  | 1.7  | 0.51 | 0.23 | 1.13 |
| Dolecek et al. 1991  | 1 | 1251 | 105 | 0.87 | 1    | 1    | 1    |
|                      | 2 | 1253 | 99  | 1.27 | 0.94 | 0.72 | 1.22 |
|                      | 3 | 1251 | 73  | 1.57 | 0.68 | 0.52 | 0.92 |
|                      | 4 | 1251 | 91  | 1.92 | 0.86 | 0.66 | 1.13 |
|                      | 5 | 1252 | 71  | 2.8  | 0.67 | 0.50 | 0.90 |
| Gopinath et al. 2011 | 1 | 837  | 80  | 0.27 | 1    | 1    | 1    |
|                      | 2 | 838  | 78  | 0.64 | 0.95 | 0.68 | 1.34 |
|                      | 3 | 839  | 56  | 1.87 | 0.74 | 0.51 | 1.08 |

Abbreviations: RR: risk ratio- LL: lower limit- UL: upper limit- ALA:  $\alpha$ -linolenic acid

**Supplemental Table 7:** Extracted and calculated data for the nonlinear dose-response analysis of dietary ALA and CVD mortality

| Author               | Category | Participations | Deaths | Median of g/d from ALA intake | RR   | LL   | UL   |
|----------------------|----------|----------------|--------|-------------------------------|------|------|------|
| Wang et al. 2016     | 1        | 16,669         | 936    | 0.7                           | 1    | 1    | 1    |
|                      | 2        | 16670          | 741    | 0.84                          | 0.89 | 0.81 | 0.99 |
|                      | 3        | 16670          | 744    | 0.93                          | 0.96 | 0.86 | 1.06 |
|                      | 4        | 16670          | 730    | 1.03                          | 0.92 | 0.82 | 1.03 |
|                      | 5        | 16670          | 849    | 1.2                           | 0.90 | 0.80 | 1.02 |
| Wang et al. 2016     | 1        | 8,576          | 727    | 0.83                          | 1    | 1    | 1    |
|                      | 2        | 8577           | 740    | 0.99                          | 0.99 | 0.89 | 1.11 |
|                      | 3        | 8577           | 754    | 1.15                          | 0.99 | 0.89 | 1.10 |
|                      | 4        | 8577           | 788    | 1.24                          | 1.00 | 0.89 | 1.12 |
|                      | 5        | 8577           | 869    | 1.49                          | 0.97 | 0.86 | 1.1  |
| Jiao et al. 2019     | 1        | 2834           | 195    | 0.69                          | 1    | 1    | 1    |
|                      | 2        | 2814           | 168    | 0.88                          | 1.06 | 0.85 | 1.32 |
|                      | 3        | 2752           | 142    | 1.04                          | 0.98 | 0.76 | 1.26 |
|                      | 4        | 2810           | 141    | 1.35                          | 1.13 | 0.85 | 1.51 |
| Fretts et al. 2014   | 1        | 516            | 89     | 0.94                          | 1    | 1    | 1    |
|                      | 2        | 516            | 83     | 1.04                          | 0.93 | 0.68 | 1.25 |
|                      | 3        | 517            | 76     | 1.12                          | 0.83 | 0.61 | 1.14 |
|                      | 4        | 517            | 92     | 1.15                          | 0.97 | 0.72 | 1.31 |
|                      | 5        | 517            | 89     | 1.23                          | 0.96 | 0.71 | 1.32 |
| Pietinen et al. 1997 | 1        | 4,386          | 149    | 0.9                           | 1    | 1    | 1    |
|                      | 2        | 4,386          | 127    | 1.2                           | 0.94 | 0.74 | 1.20 |
|                      | 3        | 4,386          | 124    | 1.5                           | 0.98 | 0.77 | 1.25 |
|                      | 4        | 4,386          | 122    | 1.9                           | 1.03 | 0.81 | 1.32 |
|                      | 5        | 4,386          | 113    | 2.5                           | 0.99 | 0.76 | 1.28 |
| Oomen et al. 2001    | 1        | 222            | 12     | 0.96                          | 1    | 1    | 1    |
|                      | 2        | 223            | 15     | 1.27                          | 0.99 | 0.43 | 2.28 |
|                      | 3        | 222            | 22     | 1.61                          | 1.59 | 0.62 | 4.08 |
| Bork et al. 2016     | 1        | 5,156          | 70     | 1.53                          | 1    | 1    | 1    |
|                      | 2        | 5,156          | 78     | 1.8                           | 1.01 | 0.72 | 1.42 |
|                      | 3        | 5,156          | 100    | 2.06                          | 1.25 | 0.90 | 1.76 |
|                      | 4        | 5,157          | 101    | 2.36                          | 1.22 | 0.86 | 1.73 |
|                      | 5        | 5,157          | 68     | 2.71                          | 0.71 | 0.47 | 1.08 |
| Koh et al. 2013      | 1        | 15,814         | 1342   | 0.4                           | 1    | 1    | 1    |
|                      | 2        | 15,814         | 1267   | 0.51                          | 0.94 | 0.86 | 1.02 |
|                      | 3        | 15,814         | 1156   | 0.56                          | 0.87 | 0.79 | 0.95 |
|                      | 4        | 15,814         | 1015   | 0.8                           | 0.81 | 0.73 | 0.90 |
| Dolecek et al. 1991  | 1        | 1251           | 58     | 0.87                          | 1    | 1    | 1    |
|                      | 2        | 1253           | 52     | 1.27                          | 0.89 | 0.62 | 1.29 |
|                      | 3        | 1251           | 38     | 1.57                          | 0.65 | 0.43 | 0.97 |

|                       |   |       |     |      |      |      |      |
|-----------------------|---|-------|-----|------|------|------|------|
|                       | 4 | 1251  | 49  | 1.92 | 0.84 | 0.58 | 1.22 |
|                       | 5 | 1252  | 35  | 2.8  | 0.60 | 0.39 | 0.91 |
| Rhee et al. 2017      | 1 | 7,426 | 100 | 1.26 | 1    | 1    | 1    |
|                       | 2 | 7,836 | 89  | 1.5  | 0.86 | 0.65 | 1.15 |
|                       | 3 | 7,856 | 96  | 1.87 | 0.86 | 0.65 | 1.15 |
|                       | 4 | 7,470 | 99  | 2.24 | 0.83 | 0.62 | 1.11 |
|                       | 5 | 7,804 | 117 | 2.9  | 0.88 | 0.65 | 1.18 |
| Zhuang et al. 2019    | 1 | 9008  | 325 | 0.35 | 1    | 1    | 1    |
|                       | 2 | 9008  | 325 | 0.92 | 1.07 | 0.88 | 1.30 |
|                       | 3 | 9008  | 325 | 1.47 | 0.97 | 0.78 | 1.21 |
|                       | 4 | 9008  | 324 | 2.12 | 0.87 | 0.63 | 1.22 |
| Laaksonen et al. 2005 | 1 | 517   | 26  | 1.1  | 1    | 1    | 1    |
|                       | 2 | 517   | 26  | 1.5  | 1.16 | 0.66 | 2.02 |
|                       | 3 | 517   | 26  | 2    | 0.63 | 0.33 | 1.21 |

Abbreviations: RR: risk ratio- LL: lower limit- UL: upper limit- ALA:  $\alpha$ -linolenic acid- CVD: cardiovascular disease



**Supplemental Table 8:** Extracted and calculated data for the nonlinear dose-response analysis of dietary ALA and CHD mortality

| Author               | Category | Participations | Deaths | Median of g/d from ALA intake | RR   | LL   | UL   |
|----------------------|----------|----------------|--------|-------------------------------|------|------|------|
| Pietinen et al.1997  | 1        | 4,386          | 149    | 0.9                           | 1    | 1    | 1    |
|                      | 2        | 4,386          | 127    | 1.2                           | 0.94 | 0.74 | 1.20 |
|                      | 3        | 4,386          | 124    | 1.5                           | 0.98 | 0.77 | 1.25 |
|                      | 4        | 4,386          | 122    | 1.9                           | 1.03 | 0.81 | 1.32 |
|                      | 5        | 4,386          | 113    | 2.5                           | 0.99 | 0.76 | 1.28 |
| Oomen et al. 2001    | 1        | 222            | 12     | 0.96                          | 1    | 1    | 1    |
|                      | 2        | 223            | 15     | 1.27                          | 0.99 | 0.43 | 2.28 |
|                      | 3        | 222            | 22     | 1.61                          | 1.59 | 0.62 | 4.08 |
| Bork et al. 2016     | 1        | 5,156          | 70     | 1.53                          | 1    | 1    | 1    |
|                      | 2        | 5,156          | 78     | 1.8                           | 1.01 | 0.72 | 1.42 |
|                      | 3        | 5,156          | 100    | 2.06                          | 1.25 | 0.90 | 1.76 |
|                      | 4        | 5,157          | 101    | 2.36                          | 1.22 | 0.86 | 1.73 |
|                      | 5        | 5,157          | 68     | 2.71                          | 0.71 | 0.47 | 1.08 |
| Dolecek et al. 1991  | 1        | 1251           | 43     | 0.87                          | 1    | 1    | 1    |
|                      | 2        | 1253           | 40     | 1.27                          | 0.92 | 0.60 | 1.41 |
|                      | 3        | 1251           | 24     | 1.57                          | 0.55 | 0.34 | 0.91 |
|                      | 4        | 1251           | 40     | 1.92                          | 0.93 | 0.6  | 1.42 |
|                      | 5        | 1252           | 28     | 2.8                           | 0.65 | 0.40 | 1.04 |
| Ascherio et al. 1995 | 1        | 8,751          | 40     | 0.8                           | 1    | 1    | 1    |
|                      | 2        | 8,751          | 44     | 0.9                           | 1.12 | 0.72 | 1.72 |
|                      | 3        | 8,751          | 42     | 1.1                           | 1.02 | 0.66 | 1.58 |
|                      | 4        | 8,751          | 59     | 1.2                           | 1.35 | 0.90 | 2.03 |
|                      | 5        | 8,751          | 44     | 1.5                           | 1.03 | 0.66 | 1.59 |
| Albert et al. 2016   | 1        | 15,352         | 54     | 0.71                          | 1    | 1    | 1    |
|                      | 2        | 15,352         | 44     | 0.86                          | 0.86 | 0.57 | 1.29 |
|                      | 3        | 15,352         | 40     | 0.98                          | 0.76 | 0.50 | 1.16 |
|                      | 4        | 15,352         | 32     | 1.12                          | 0.62 | 0.39 | 0.98 |
|                      | 5        | 15,352         | 36     | 1.36                          | 0.6  | 0.37 | 0.96 |
| Albert et al. 2016   | 1        | 15,352         | 146    | 0.71                          | 1    | 1    | 1    |
|                      | 2        | 15,352         | 144    | 0.86                          | 1.13 | 0.89 | 1.43 |
|                      | 3        | 15,352         | 116    | 0.98                          | 0.92 | 0.71 | 1.18 |
|                      | 4        | 15,352         | 112    | 1.12                          | 0.96 | 0.74 | 1.25 |
|                      | 5        | 15,352         | 123    | 1.36                          | 1.01 | 0.77 | 1.33 |
| Fretts et al. 2014   | 1        | 516            | 0.61   | 0.94                          | 1    | 1    | 1    |
|                      | 2        | 516            | 55     | 1.04                          | 0.89 | 0.62 | 1.29 |
|                      | 3        | 517            | 50     | 1.12                          | 0.83 | 0.57 | 1.21 |
|                      | 4        | 517            | 62     | 1.15                          | 0.94 | 0.65 | 1.36 |
|                      | 5        | 517            | 52     | 1.23                          | 0.85 | 0.58 | 1.26 |
| Koh et al. 2013      | 1        | 15,814         | 730    | 0.4                           | 1    | 1    | 1    |

|                    |   |        |     |      |      |      |      |
|--------------------|---|--------|-----|------|------|------|------|
|                    | 2 | 15,814 | 733 | 0.51 | 1.01 | 0.90 | 1.13 |
|                    | 3 | 15,814 | 651 | 0.56 | 0.90 | 0.79 | 1.01 |
|                    | 4 | 15,814 | 583 | 0.8  | 0.82 | 0.71 | 0.93 |
| Zhuang et al. 2019 | 1 | 9008   | 244 | 0.35 | 1    | 1    | 1    |
|                    | 2 | 9008   | 245 | 0.92 | 1.10 | 0.90 | 1.33 |
|                    | 3 | 9008   | 245 | 1.47 | 0.97 | 0.77 | 1.23 |
|                    | 4 | 9008   | 244 | 2.12 | 0.98 | 0.65 | 1.46 |

---

Abbreviations: RR: risk ratio- LL: lower limit- UL: upper limit- ALA:  $\alpha$ -linolenic acid- CHD: coronary heart disease

**Supplemental Table 9:** Extracted and calculated data for the nonlinear dose-response analysis of dietary ALA and cancer mortality

| Author               | Category | Participations | Deaths | Median of g/d from ALA intake | RR   | LL   | UL   |
|----------------------|----------|----------------|--------|-------------------------------|------|------|------|
| Jiao et al. 2019     | 1        | 2834           | 149    | 0.69                          | 1    | 1    | 1    |
|                      | 2        | 2814           | 130    | 0.88                          | 1.00 | 0.78 | 1.29 |
|                      | 3        | 2752           | 79     | 1.04                          | 0.63 | 0.46 | 0.85 |
|                      | 4        | 2810           | 93     | 1.35                          | 0.75 | 0.53 | 1.05 |
| Wang et al. 2016     | 1        | 16,669         | 1558   | 0.7                           | 1    | 1    | 1    |
|                      | 2        | 16670          | 1517   | 0.84                          | 1.05 | 0.97 | 1.13 |
|                      | 3        | 16670          | 1559   | 0.93                          | 1.12 | 1.04 | 1.21 |
|                      | 4        | 16670          | 1556   | 1.03                          | 1.11 | 1.03 | 1.20 |
|                      | 5        | 16670          | 1729   | 1.2                           | 1.1  | 1.01 | 1.20 |
| Wang et al. 2016     | 1        | 8,576          | 723    | 0.83                          | 1    | 1    | 1    |
|                      | 2        | 8577           | 821    | 0.99                          | 1.11 | 1.00 | 1.23 |
|                      | 3        | 8577           | 830    | 1.15                          | 1.10 | 0.99 | 1.22 |
|                      | 4        | 8577           | 864    | 1.24                          | 1.11 | 0.99 | 1.24 |
|                      | 5        | 8577           | 954    | 1.49                          | 1.15 | 1.02 | 1.29 |
| Khankari et al. 2015 | 1        | 365            | 46     | 0.38                          | 1    | 1    | 1    |
|                      | 2        | 366            | 50     | 0.53                          | 1.06 | 0.71 | 1.60 |
|                      | 3        | 366            | 57     | 0.89                          | 1.17 | 0.77 | 1.77 |
|                      | 4        | 366            | 57     | 1.1                           | 1.03 | 0.64 | 1.68 |
| Dolecek et al. 1991  | 1        | 1251           | 25     | 0.87                          | 1    | 1    | 1    |
|                      | 2        | 1253           | 34     | 1.27                          | 1.36 | 0.81 | 2.26 |
|                      | 3        | 1251           | 22     | 1.57                          | 0.87 | 0.49 | 1.55 |
|                      | 4        | 1251           | 29     | 1.92                          | 1.16 | 0.68 | 1.96 |
|                      | 5        | 1252           | 22     | 2.8                           | 0.87 | 0.49 | 1.55 |
| Pelser et al. 2013   | 1        | 57,653         | 136    | 0.82                          | 1    | 1    | 1    |
|                      | 2        | 57,653         | 152    | 1.04                          | 1.09 | 0.86 | 1.38 |
|                      | 3        | 57,653         | 129    | 1.2                           | 0.91 | 0.71 | 1.16 |
|                      | 4        | 57,653         | 144    | 1.4                           | 1.00 | 0.78 | 1.27 |
|                      | 5        | 57,653         | 164    | 1.76                          | 1.13 | 0.89 | 1.43 |
| Zhuang et al. 2019   | 1        | 9008           | 275    | 0.35                          | 1    | 1    | 1    |
|                      | 2        | 9008           | 275    | 0.92                          | 0.92 | 0.73 | 1.15 |
|                      | 3        | 9008           | 275    | 1.47                          | 0.96 | 0.74 | 1.25 |
|                      | 4        | 9008           | 275    | 2.12                          | 0.89 | 0.66 | 1.19 |

Abbreviations: RR: risk ratio- LL: lower limit- UL: upper limit- ALA:  $\alpha$ -linolenic acid



|                           |          |          |          |     |     |     |     |          |
|---------------------------|----------|----------|----------|-----|-----|-----|-----|----------|
| Del Gobbo et al. 2016     | Low      | Low      | Low      | Low | Low | Low | Low | Low      |
| Jayanama et al. 2020      | Moderate | Low      | Moderate | Low | Low | Low | Low | Moderate |
| Simon et al. 1998         | Moderate | Moderate | Low      | Low | Low | Low | Low | Moderate |
| Pelser et al. 2013        | Moderate | Low      | Low      | Low | Low | Low | Low | Moderate |
| Harris et al. 2018        | Low      | Low      | Low      | Low | Low | Low | Low | Low      |
| Kleber et al. 2016        | Low      | Low      | Low      | Low | Low | Low | Low | Low      |
| Perez-Cornago et al. 2020 | Low      | Low      | Moderate | Low | Low | Low | Low | Moderate |
| Harris et al. 2021        | Low      | Low      | Low      | Low | Low | Low | Low | Low      |

Abbreviation: ROBINS-E: risk of bias in non-randomized studies of exposures

The risk of bias in non-randomized studies of exposures (ROBINS-E) tool comprises 7 domains through which bias might be introduced. The questions of these domains include: (1) bias due to confounding, (2) bias in selection of participants into study, (3) bias in the classification of exposures, (4) bias due to departure from intended exposures, (5) bias due to missing data, (6) bias in the measurement of outcomes, and (7) bias in the selection of reported results. Studies were categorized as low risk, moderate risk, serious risk, and critical risk of bias under each domain.

**Supplemental Table 11:** Summary risk estimates for the association between ALA and risk of mortality in adults aged  $\geq 18$  years<sup>1</sup>

|                                          | #RR <sup>2</sup> | Pooled RR (95% CI) | Baseline Risk per 10,000 Person-years <sup>3</sup> | AR per 10,000 person-years (95% CI) | I <sup>2</sup> (%) <sup>4</sup> | P-heterogeneity <sup>5</sup> |
|------------------------------------------|------------------|--------------------|----------------------------------------------------|-------------------------------------|---------------------------------|------------------------------|
| <b>ALA and all-cause mortality</b>       |                  |                    |                                                    |                                     |                                 |                              |
| <b>The highest vs. lowest comparison</b> |                  |                    |                                                    |                                     |                                 |                              |
| Dietary ALA intake                       |                  |                    |                                                    |                                     |                                 |                              |
| Random                                   | 15               | 0.90 (0.83-0.97)   | 1130                                               | -113 (-192 to -34)                  | 77.8                            | <0.001                       |
| Fixed                                    | 15               | 1.01 (0.99-1.03)   | 1130                                               | 11 (-11 to 34)                      | 77.8                            | <0.001                       |
| <b>Tissue ALA levels</b>                 |                  |                    |                                                    |                                     |                                 |                              |
| Random                                   | 15               | 0.95 (0.90-0.99)   | 1130                                               | -57 (-113 to -11)                   | 8.2                             | 0.36                         |
| Fixed                                    | 15               | 0.94 (0.91-0.98)   | 1130                                               | -68 (-102 to -23)                   | 8.2                             | 0.36                         |
| <b>Linear dose-response association</b>  |                  |                    |                                                    |                                     |                                 |                              |
| Dietary ALA intake                       |                  |                    |                                                    |                                     |                                 |                              |
| Random                                   | 12               | 0.95 (0.91-0.99)   | 1130                                               | -57 (-102 to -11)                   | 76.2                            | <0.001                       |
| Fixed                                    | 12               | 0.99 (0.98-1.01)   | 1130                                               | -11 (-23 to 11)                     | 76.2                            | <0.001                       |
| <b>Tissue ALA levels</b>                 |                  |                    |                                                    |                                     |                                 |                              |
| Random                                   | 11               | 0.97 (0.94-1.01)   | 1130                                               | -34 (-68 to 11)                     | 29.5                            | 0.16                         |
| Fixed                                    | 11               | 0.98 (0.96-1.01)   | 1130                                               | -23 (-45 to 11)                     | 29.5                            | 0.16                         |
| <b>ALA and CVD mortality</b>             |                  |                    |                                                    |                                     |                                 |                              |
| <b>The highest vs. lowest comparison</b> |                  |                    |                                                    |                                     |                                 |                              |
| Dietary ALA intake                       |                  |                    |                                                    |                                     |                                 |                              |
| Random                                   | 16               | 0.92 (0.86-0.99)   | 410                                                | -33 (-57 to -4)                     | 48.2                            | 0.01                         |
| Fixed                                    | 16               | 0.96 (0.93-0.99)   | 410                                                | -16 (-29 to -4)                     | 48.2                            | 0.01                         |
| <b>Tissue ALA levels</b>                 |                  |                    |                                                    |                                     |                                 |                              |
| Random                                   | 21               | 0.98 (0.86-1.11)   | 410                                                | -8 (-57 to 45)                      | 45.6                            | 0.01                         |
| Fixed                                    | 21               | 0.99 (0.92-1.06)   | 410                                                | -4 (-33 to 25)                      | 45.6                            | 0.01                         |
| <b>Linear dose-response association</b>  |                  |                    |                                                    |                                     |                                 |                              |
| Dietary ALA intake                       |                  |                    |                                                    |                                     |                                 |                              |
| Random                                   | 14               | 0.95 (0.91-0.98)   | 410                                                | -21 (-37 to -8)                     | 30.7                            | 0.13                         |
| Fixed                                    | 14               | 0.96 (0.93-0.98)   | 410                                                | -16 (-29 to -8)                     | 30.7                            | 0.13                         |
| <b>Tissue ALA levels</b>                 |                  |                    |                                                    |                                     |                                 |                              |
| Random                                   | 17               | 0.97 (0.91-1.03)   | 410                                                | -12 (-37 to 12)                     | 54.2                            | 0.004                        |
| Fixed                                    | 17               | 0.96 (0.90-1.03)   | 410                                                | -16 (-41 to 12)                     | 54.2                            | 0.004                        |
| <b>ALA and CHD mortality</b>             |                  |                    |                                                    |                                     |                                 |                              |
| <b>The highest vs. lowest comparison</b> |                  |                    |                                                    |                                     |                                 |                              |
| Dietary ALA intake                       |                  |                    |                                                    |                                     |                                 |                              |
| Random                                   | 9                | 0.89 (0.81-0.97)   | 210                                                | -23 (-40 to -6)                     | 5.6                             | 0.38                         |
| Fixed                                    | 9                | 0.88 (0.81-0.96)   | 210                                                | -25 (-40 to -8)                     | 5.6                             | 0.38                         |
| <b>Tissue ALA levels</b>                 |                  |                    |                                                    |                                     |                                 |                              |
| Random                                   | 16               | 0.90 (0.70-1.15)   | 210                                                | -21 (-63 to 32)                     | 57                              | 0.003                        |
| Fixed                                    | 16               | 0.88 (0.76-1.01)   | 210                                                | -25 (-50 to 2)                      | 57                              | 0.003                        |
| <b>Linear dose-response association</b>  |                  |                    |                                                    |                                     |                                 |                              |
| Dietary ALA intake                       |                  |                    |                                                    |                                     |                                 |                              |
| Random                                   | 10               | 0.95 (0.90-1.01)   | 210                                                | -11 (-21 to 2)                      | 10.8                            | 0.34                         |
| Fixed                                    | 10               | 0.95 (0.90-1.00)   | 210                                                | -11 (-21 to 0)                      | 10.8                            | 0.34                         |
| <b>Tissue ALA levels</b>                 |                  |                    |                                                    |                                     |                                 |                              |
| Random                                   | 16               | 0.94 (0.87-1.01)   | 210                                                | -13 (-27 to 2)                      | 61.1                            | 0.001                        |
| Fixed                                    | 16               | 0.96 (0.93-1.00)   | 210                                                | -8 (-15 to 0)                       | 61.1                            | 0.001                        |
| <b>ALA and cancer mortality</b>          |                  |                    |                                                    |                                     |                                 |                              |

**The highest vs. lowest comparison**

|                                         |    |                  |      |                   |     |      |  |
|-----------------------------------------|----|------------------|------|-------------------|-----|------|--|
| <b>Dietary ALA intake</b>               |    |                  |      |                   |     |      |  |
| Random                                  | 10 | 1.06 (1.02-1.11) | 1050 | 63 (21 to 116)    | 3.8 | 0.40 |  |
| Fixed                                   | 10 | 1.06 (1.02-1.10) | 1050 | 63 (21 to 105)    | 3.8 | 0.40 |  |
| <b>Tissue ALA levels</b>                |    |                  |      |                   |     |      |  |
| Random                                  | 4  | 0.93 (0.86-1.01) | 1050 | -74 (-147 to 11)  | 0   | 0.39 |  |
| Fixed                                   | 4  | 0.93 (0.86-1.01) | 1050 | -74 (-147 to 11)  | 0   | 0.39 |  |
| <b>Linear dose-response association</b> |    |                  |      |                   |     |      |  |
| <b>Dietary ALA intake</b>               |    |                  |      |                   |     |      |  |
| Random                                  | 8  | 1.03 (0.98-1.08) | 1050 | 32 (-21 to 84)    | 51  | 0.04 |  |
| Fixed                                   | 8  | 1.04 (1.01-1.06) | 1050 | 42 (11 to 63)     | 51  | 0.04 |  |
| <b>Tissue ALA levels</b>                |    |                  |      |                   |     |      |  |
| Random                                  | 2  | 0.99 (0.88-1.11) | 1050 | -11 (-126 to 116) | 0   | 0.83 |  |
| Fixed                                   | 2  | 0.99 (0.88-1.11) | 1050 | -11 (-126 to 116) | 0   | 0.83 |  |

<sup>1</sup>Abbreviation: ALA,  $\alpha$ -linolenic acid; BMI, body mass index; CI, confidence interval; RR, relative risk; CVD, cardiovascular disease; AR, absolute risk

<sup>2</sup>Number of effect sizes

<sup>3</sup>Baseline risks for all-cause, CVD, and CHD mortality were obtained from the Emerging Risk Factors Collaboration that contained data from 102 international cohorts. For cancer mortality, baseline risk was based on the GLOBOCAN that described cancer incidence and mortality from 20 large areas of the world

<sup>4</sup>Inconsistency- the percentage of variation across studies due to heterogeneity

<sup>5</sup>Obtained from the Q-test

**Supplemental Table 12:** Relative risks and 95% CIs of mortality in different doses of ALA based on the nonlinear dose-response analysis

| ALA (g/d)                 | All-cause mortality |                  |                  | CVD mortality    | CHD mortality    | Cancer mortality |
|---------------------------|---------------------|------------------|------------------|------------------|------------------|------------------|
|                           | Total               | Male             | Female           |                  |                  |                  |
| 0.27-0.40                 | 1.00 (0.27 g/d)     | 1.00 (0.35)      | 1.00 (0.35)      | 1.00 (0.35 g/d)  | 1.00 (0.40 g/d)  | 1.00 (0.35 g/d)  |
| 0.50                      | 0.99 (0.97-1.02)    | 0.98 (0.94-1.03) | 1.01 (0.99-1.04) | 0.98 (0.95-1.01) | 0.93 (0.88-0.98) | 1.01 (0.96-1.07) |
| 0.75                      | 0.98 (0.92-1.04)    | 0.95 (0.84-1.08) | 1.03 (0.96-1.11) | 0.94 (0.87-1.02) | 0.89 (0.80-1.00) | 1.03 (0.89-1.20) |
| 1.00                      | 0.96 (0.88-1.05)    | 0.92 (0.75-1.13) | 1.04 (0.95-1.14) | 0.91 (0.81-1.03) | 0.82 (0.68-0.99) | 1.05 (0.83-1.32) |
| 1.25                      | 0.94 (0.85-1.03)    | 0.90 (0.69-1.18) | 1.02 (0.94-1.11) | 0.88 (0.75-1.04) | 0.78 (0.61-0.99) | 1.05 (0.81-1.36) |
| 1.50                      | 0.91 (0.80-1.02)    | 0.90 (0.66-1.23) | 1.00 (0.92-1.09) | 0.86 (0.72-1.03) | 0.75 (0.57-0.98) | 1.05 (0.82-1.35) |
| 1.75                      | 0.87 (0.74-1.03)    | 0.91 (0.63-1.30) | 0.98 (0.88-1.09) | 0.84 (0.70-1.02) | 0.74 (0.56-0.97) | 1.05 (0.83-1.33) |
| 2.00                      | 0.84 (0.66-1.06)    | 0.91 (0.60-1.39) | 0.96 (0.84-1.10) | 0.83 (0.68-1.00) | 0.73 (0.55-0.97) | 1.04 (0.83-1.32) |
| 2.25                      | 0.80 (0.59-1.09)    | 0.92 (0.56-1.49) | 0.94 (0.79-1.12) | 0.81 (0.67-0.99) | 0.73 (0.54-0.98) | 1.04 (0.82-1.31) |
| 2.50                      | 0.78 (0.53-1.13)    | 0.92 (0.53-1.61) | 0.92 (0.75-1.14) | 0.80 (0.65-0.98) | 0.72 (0.53-0.99) | 1.03 (0.81-1.32) |
| 2.75                      | 0.74 (0.48-1.16)    | 0.93 (0.50-1.74) | 0.90 (0.70-1.16) | 0.79 (0.64-0.98) | 0.72 (0.52-1.01) | 1.03 (0.79-1.34) |
| 3.00                      | 0.71 (0.42-1.20)    | -                | -                | 0.77 (0.62-0.98) | 0.72 (0.50-1.03) | 1.03 (0.77-1.37) |
| $P_{\text{nonlinearity}}$ | 0.58                | 0.44             | 0.31             | 0.56             | 0.13             | 0.72             |

Abbreviations: CHD: coronary heart disease- CVD: cardiovascular disease- ALA:  $\alpha$ -linolenic acid



**Online Supporting Material  
Supplemental Figure 1**

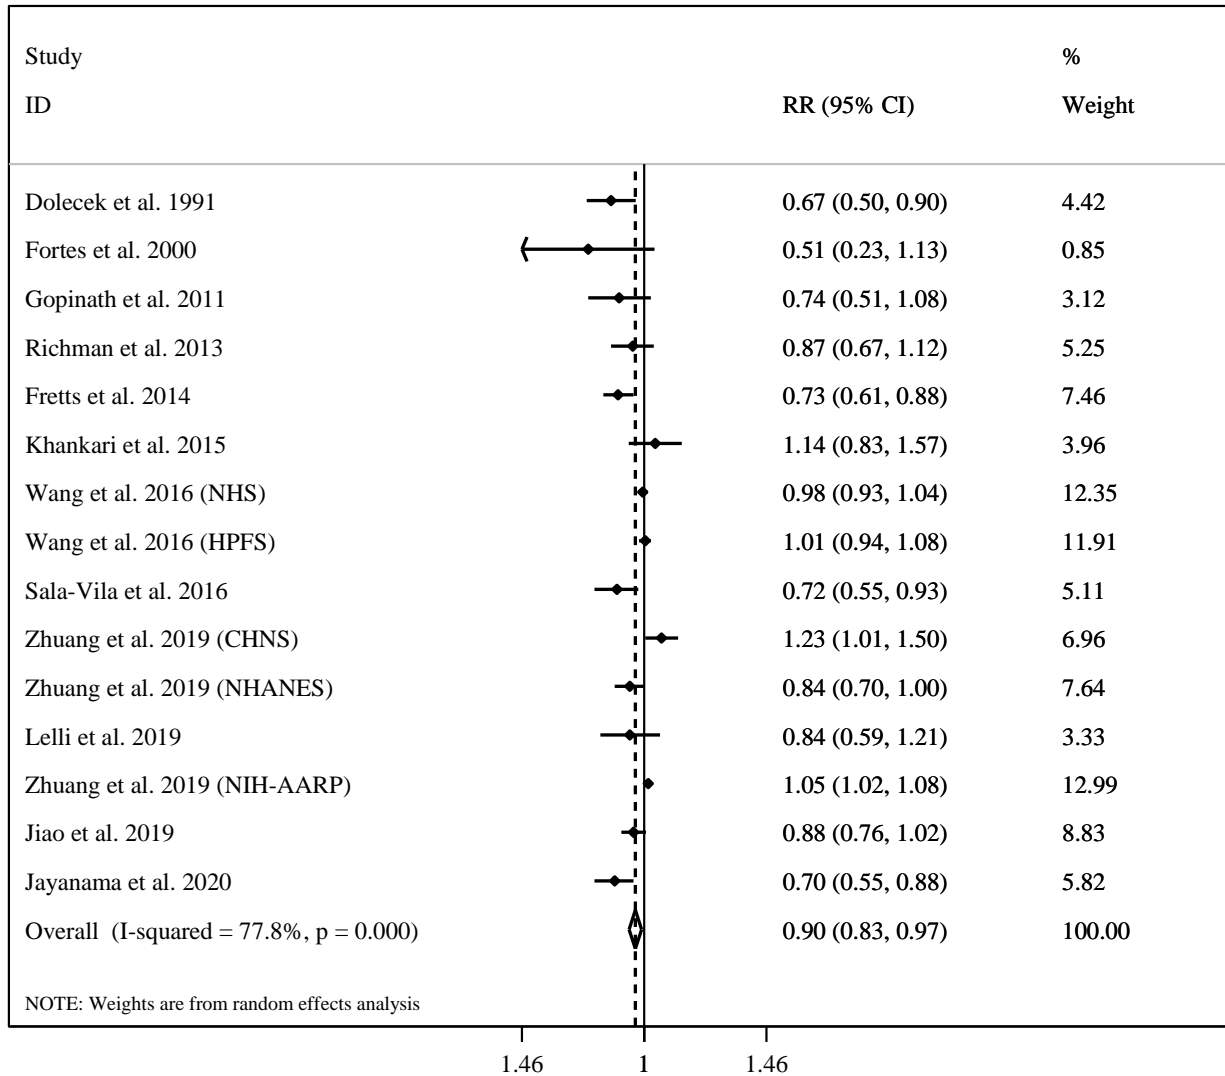

Forest plot for the association between dietary ALA intake and all-cause mortality by considering the highest and lowest intakes of ALA

**Online Supporting Material  
Supplemental Figure 2**

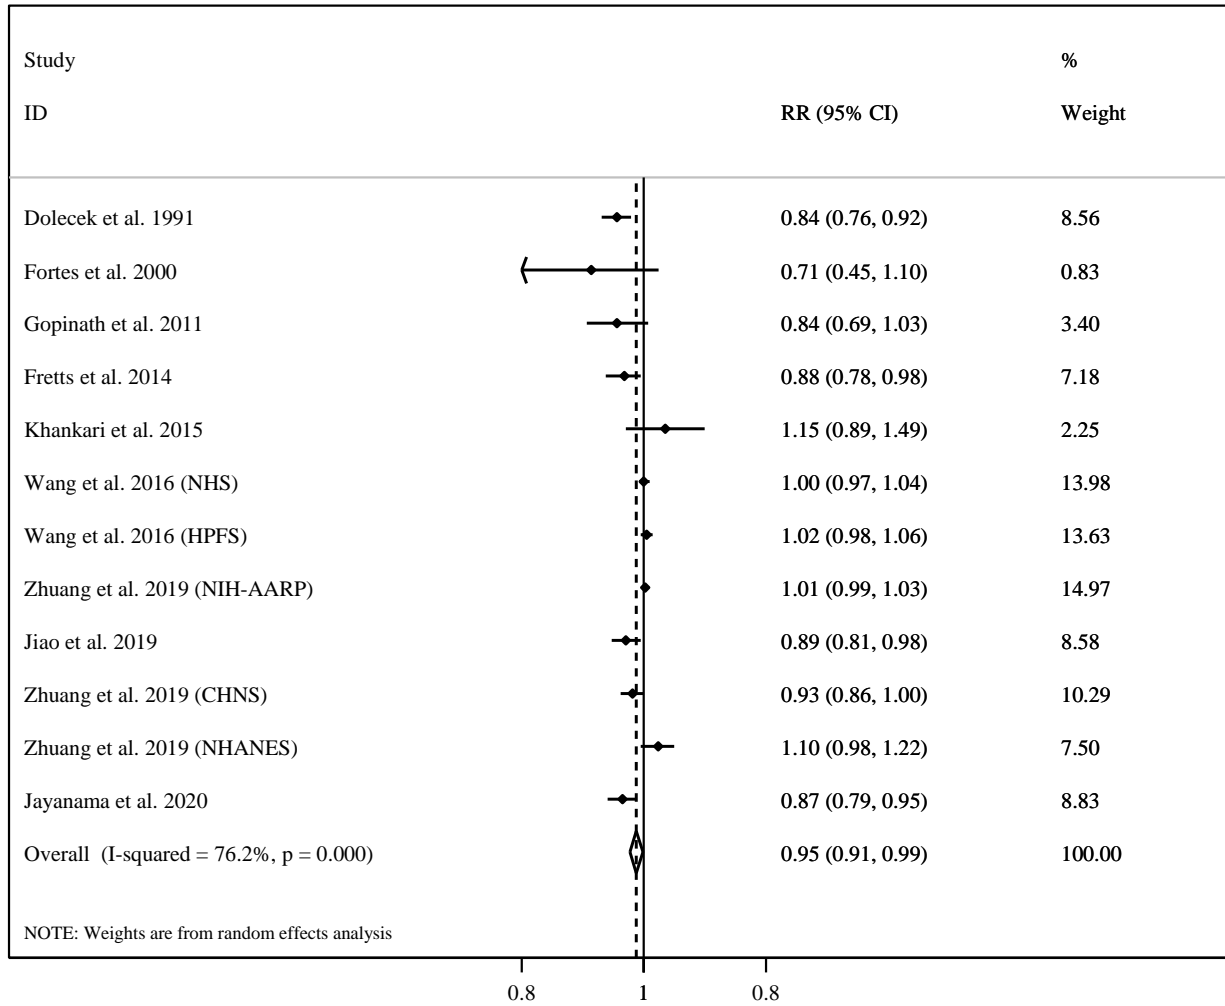

Forest plot for the association between dietary ALA intake and all-cause mortality based on a 1-g/d increase in dietary ALA intake

**Online Supporting Material  
Supplemental Figure 3**

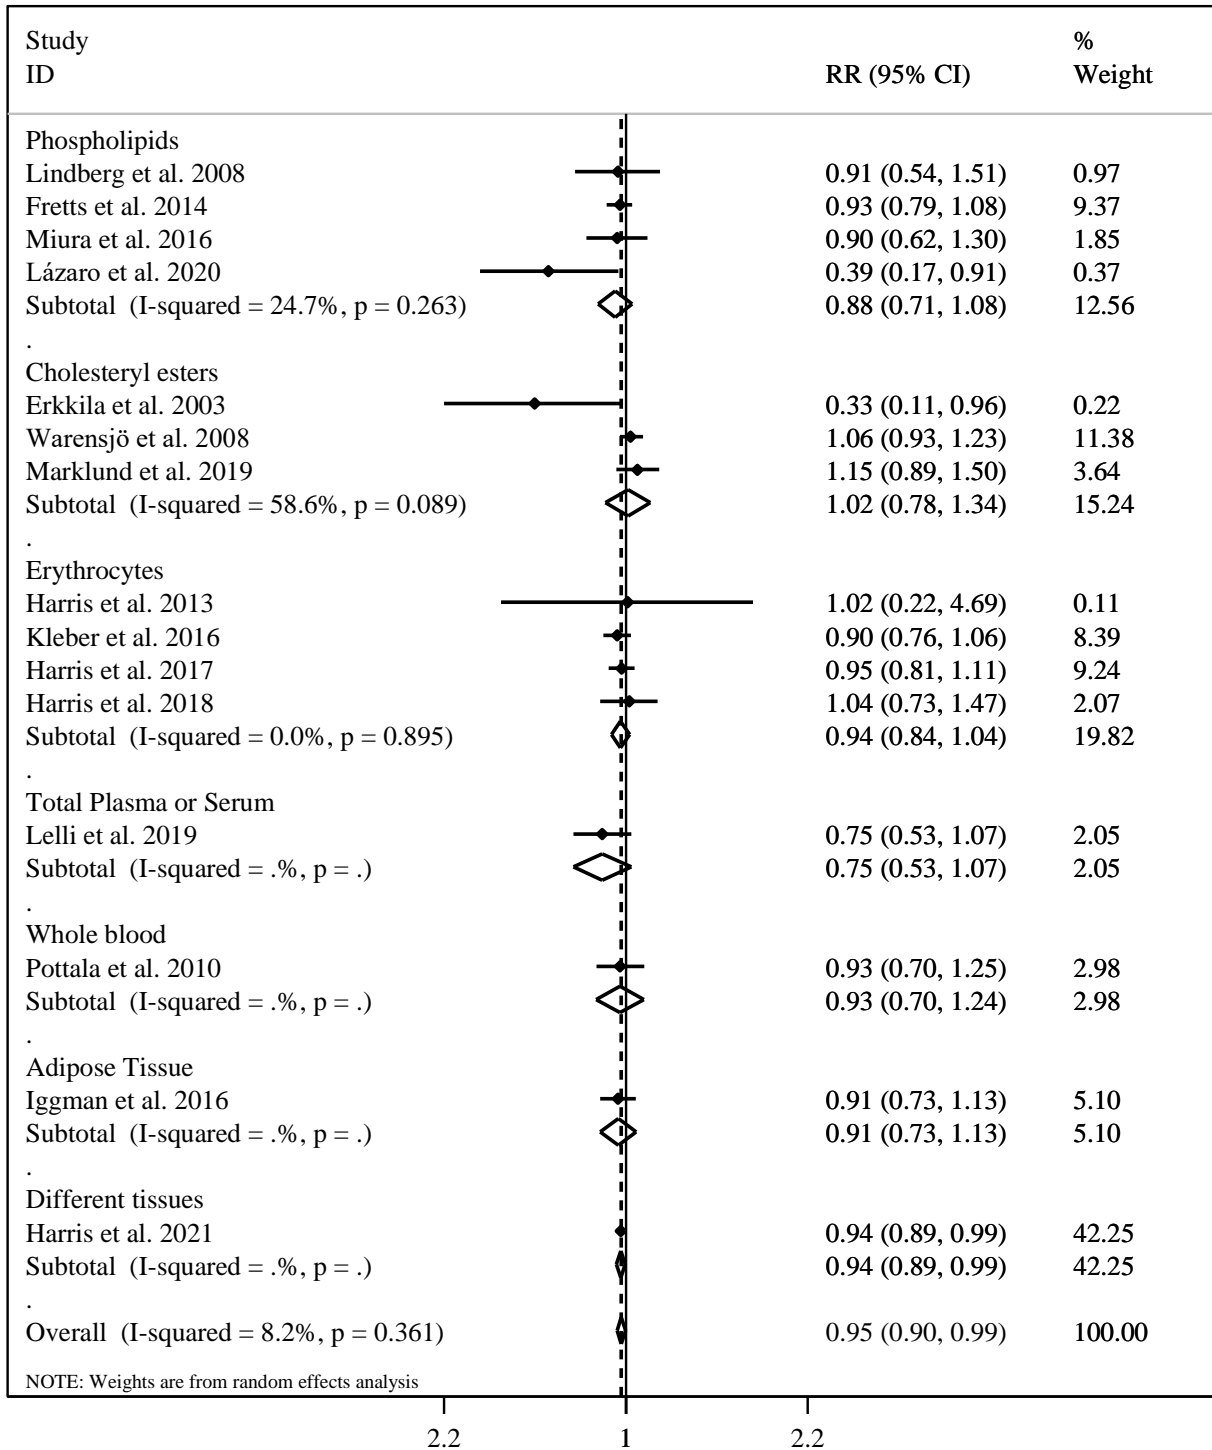

Forest plot for the association between tissue ALA levels and all-cause mortality by comparing the highest and lowest levels of ALA

**Online Supporting Material  
Supplemental Figure 4**

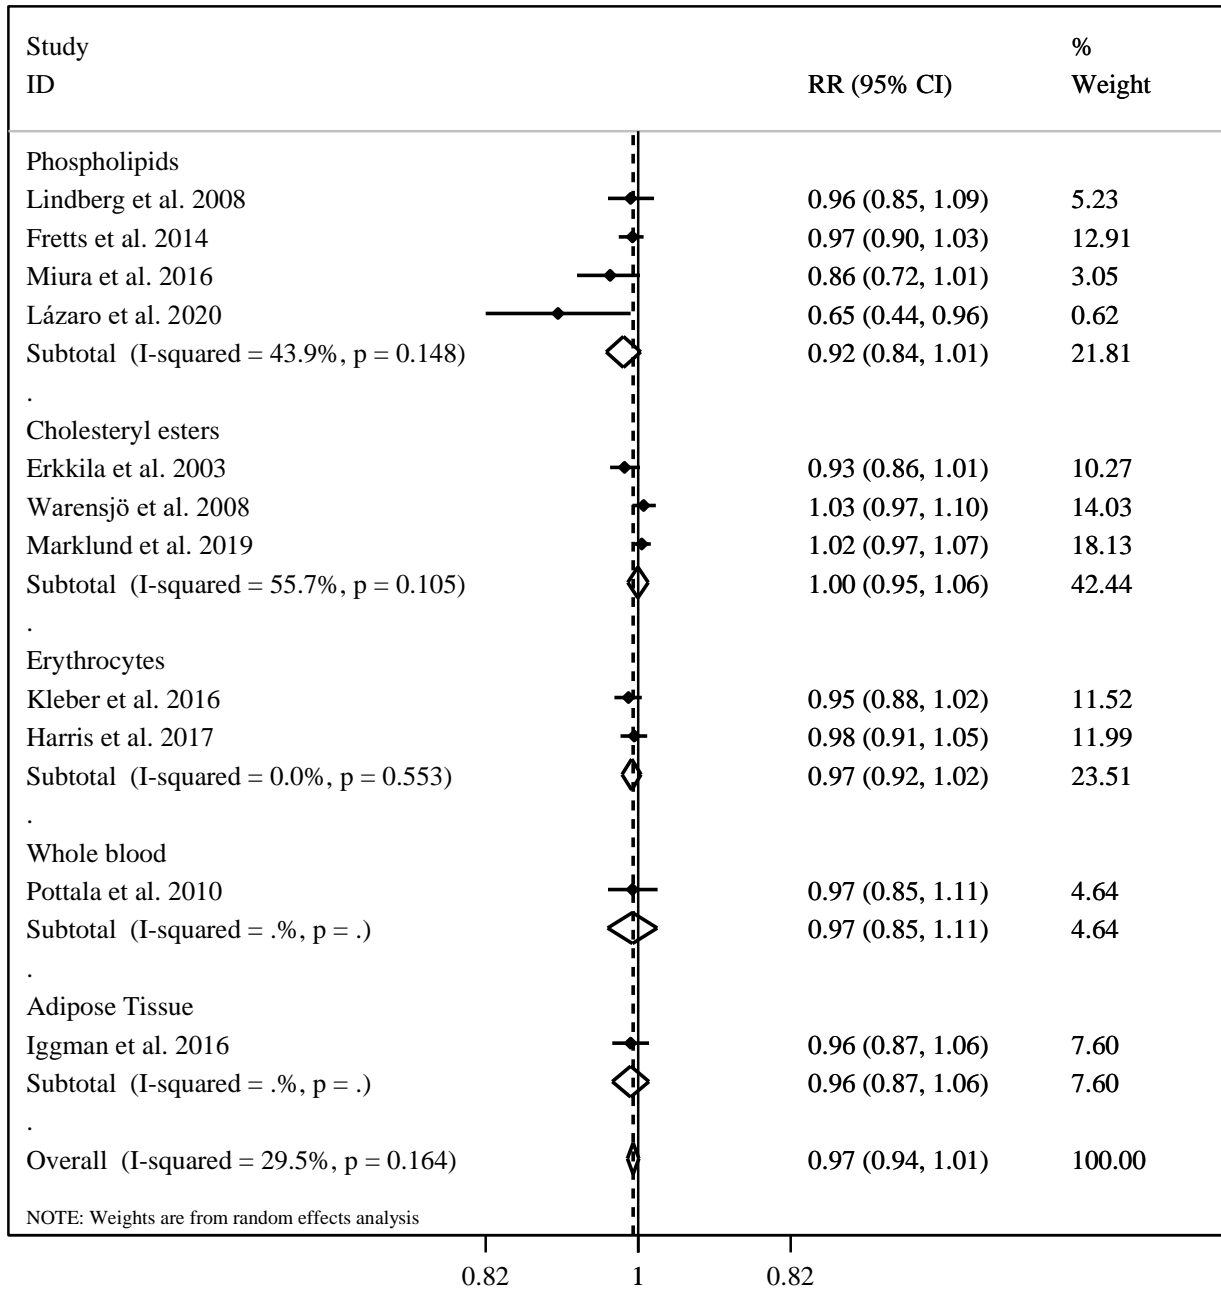

Forest plot for the association between tissue ALA levels and all-cause mortality according to a 1-SD increase in ALA levels

**Online Supporting Material  
Supplemental Figure 5**

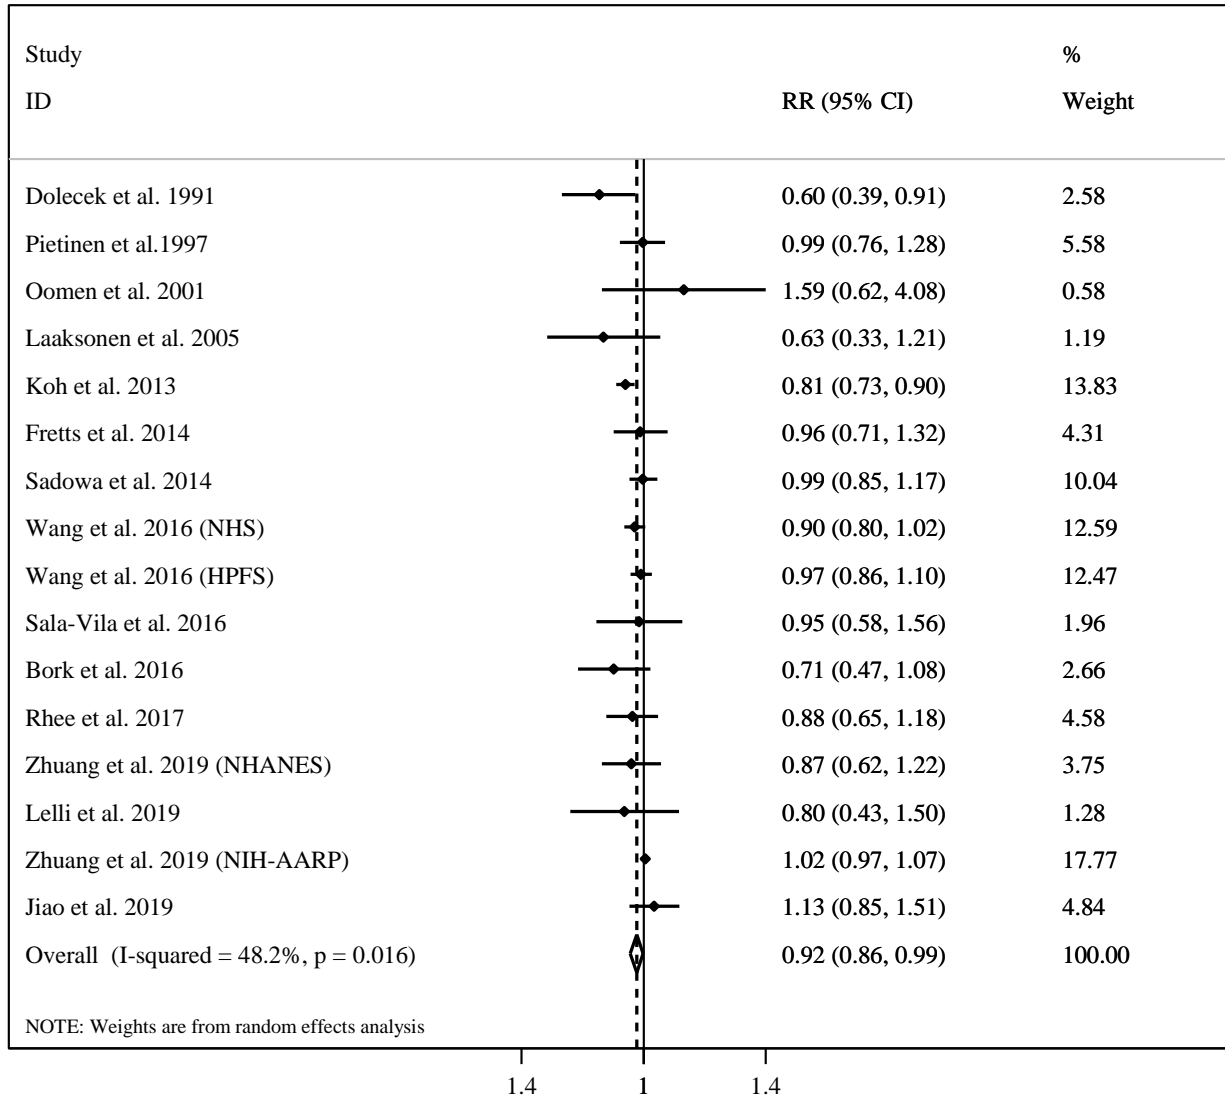

Forest plot for the association between dietary ALA intake and CVD mortality by comparing the highest and lowest intakes of ALA

**Online Supporting Material  
Supplemental Figure 6**

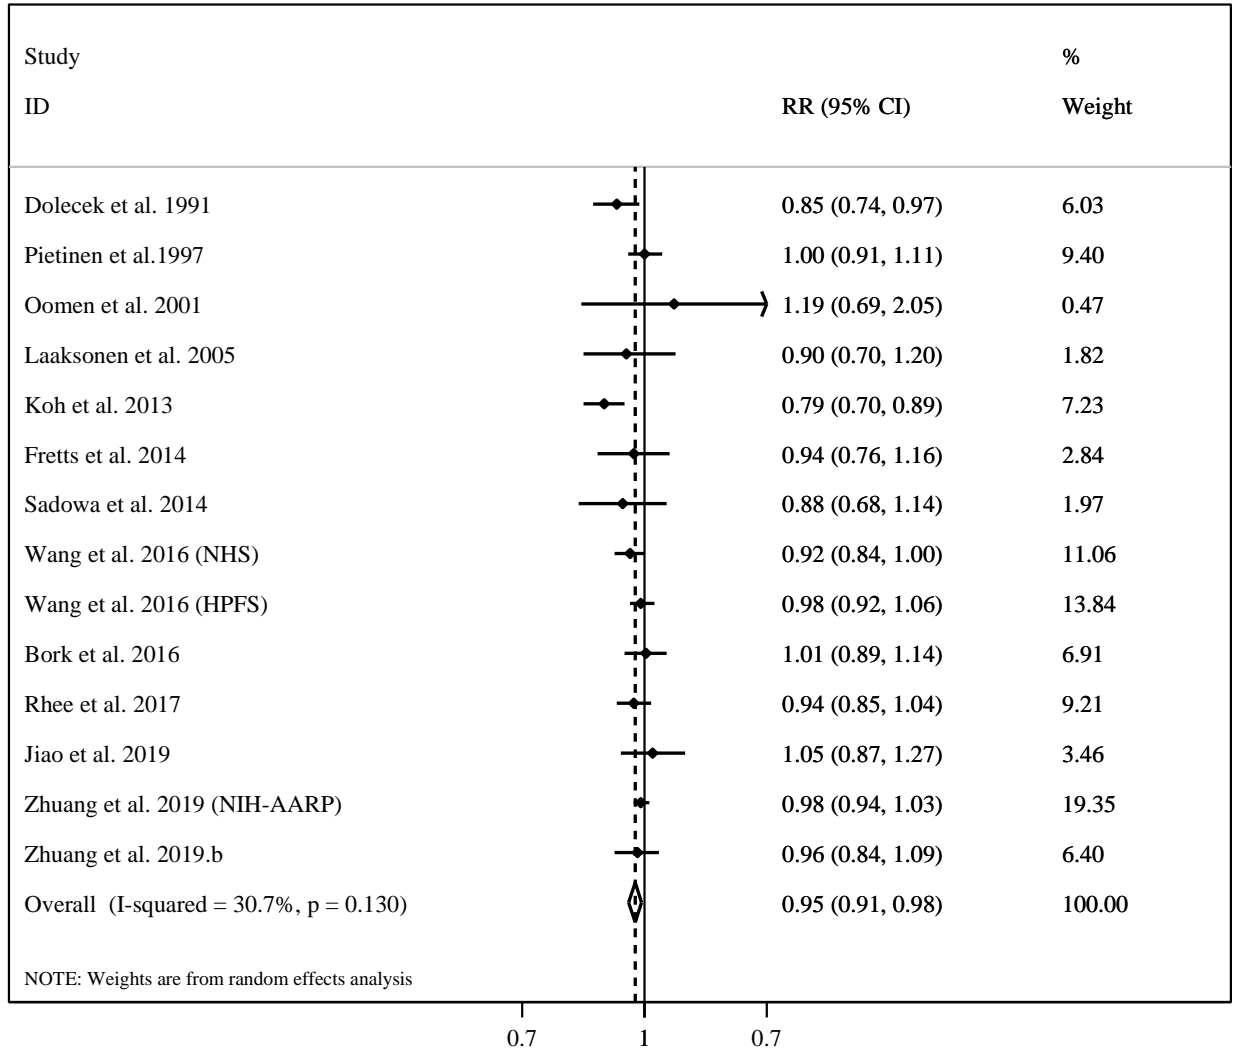

Forest plot for the association between dietary ALA intake and CVD mortality based on a 1-g/d increase in dietary ALA

**Online Supporting Material**  
**Supplemental Figure 7**

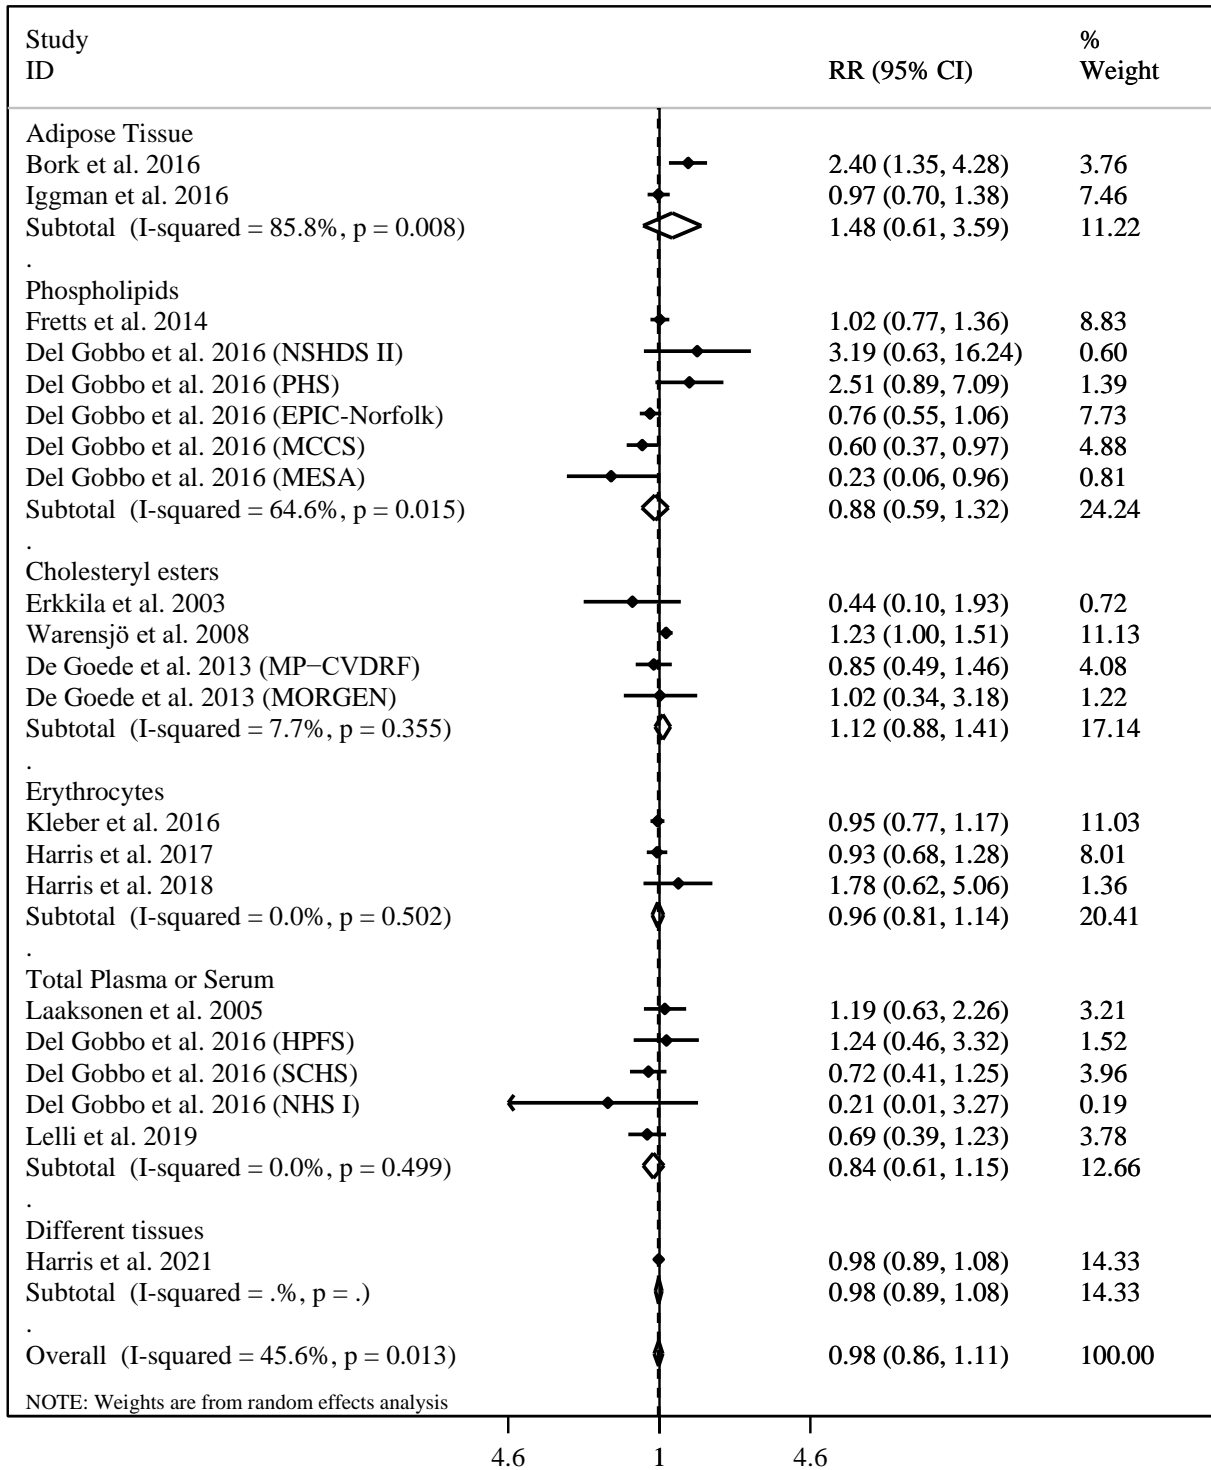

Forest plot for the association between tissue ALA levels and CVD mortality by comparing the highest and lowest levels of ALA

**Online Supporting Material  
Supplemental Figure 8**

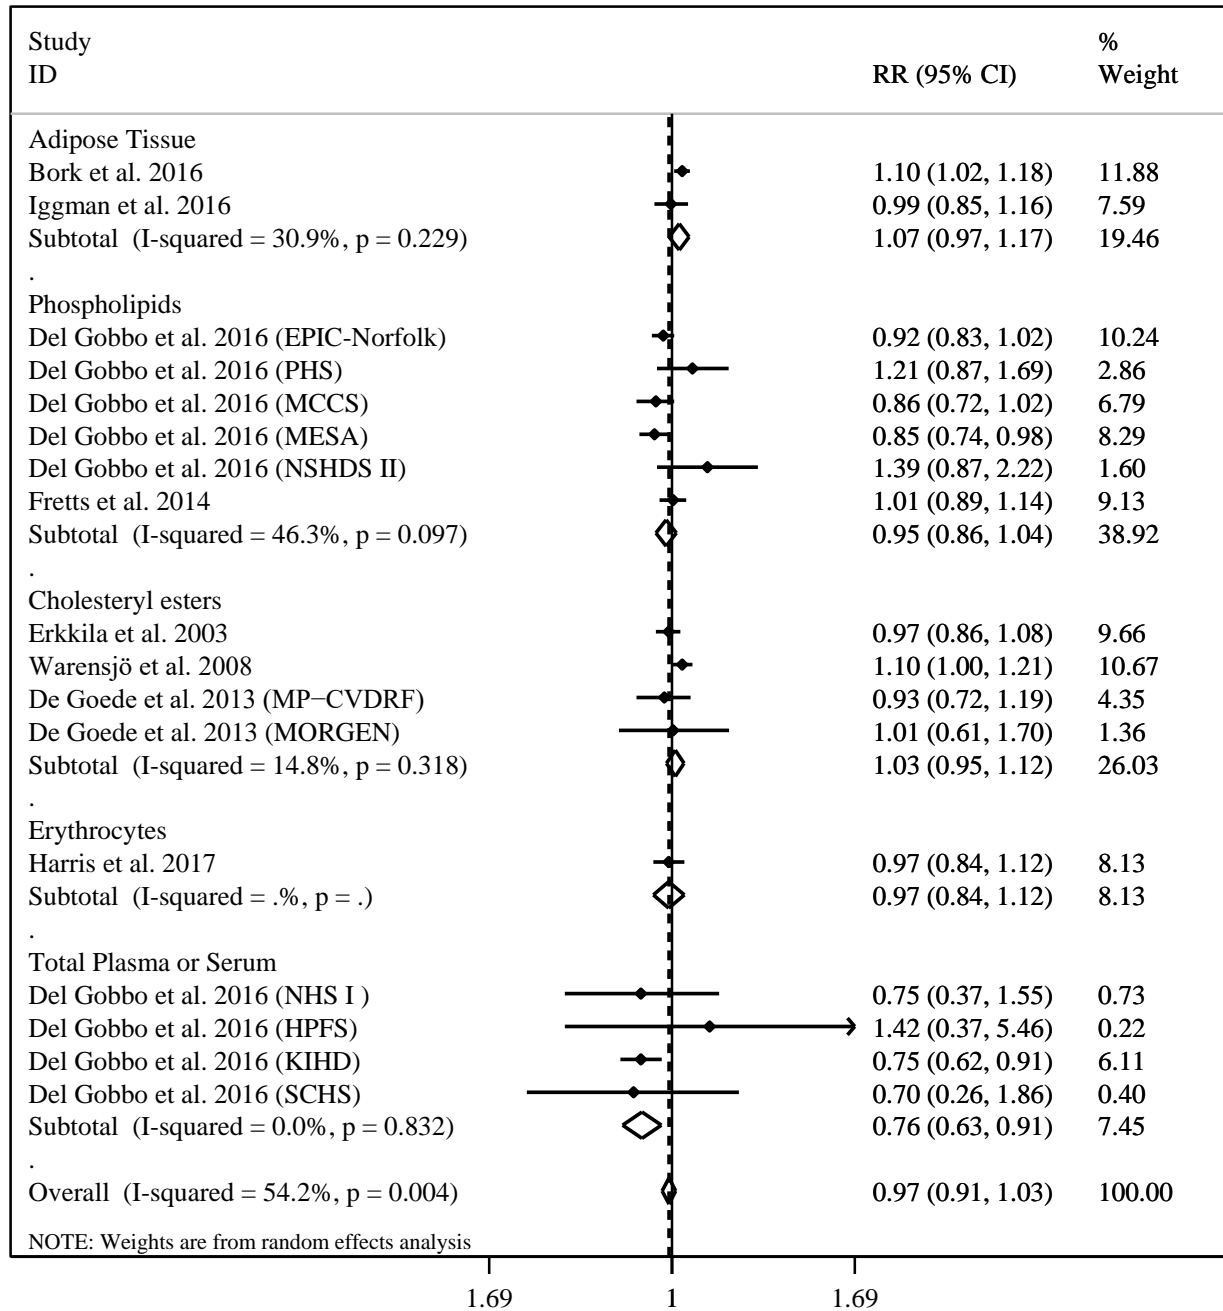

Forest plot for the association between tissue ALA levels and CVD mortality based on a 1-SD increase in ALA levels



**Online Supporting Material  
Supplemental Figure 9**

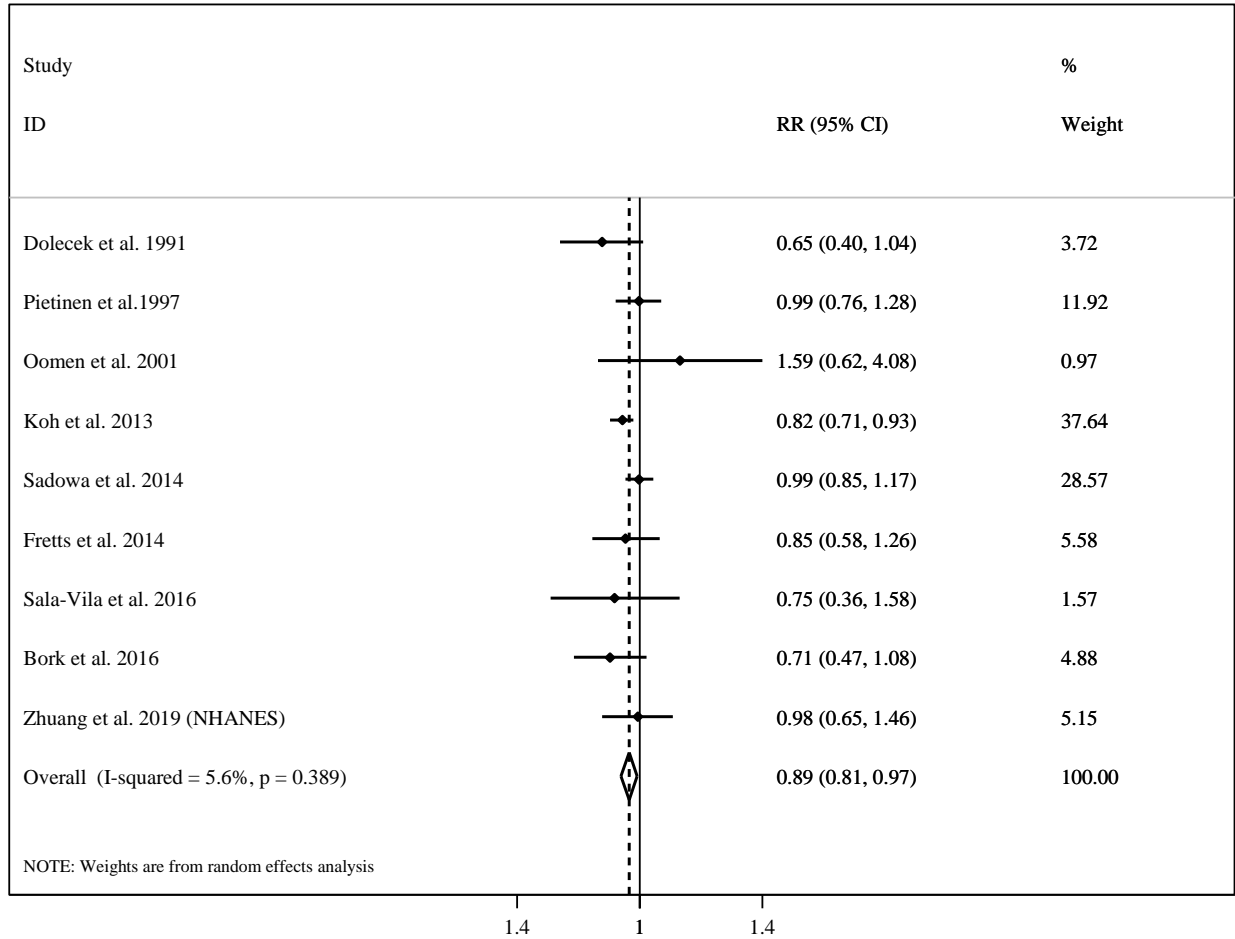

Forest plot for the association between dietary ALA intake and CHD mortality by comparing the highest and lowest intakes of ALA

**Online Supporting Material  
Supplemental Figure 10**

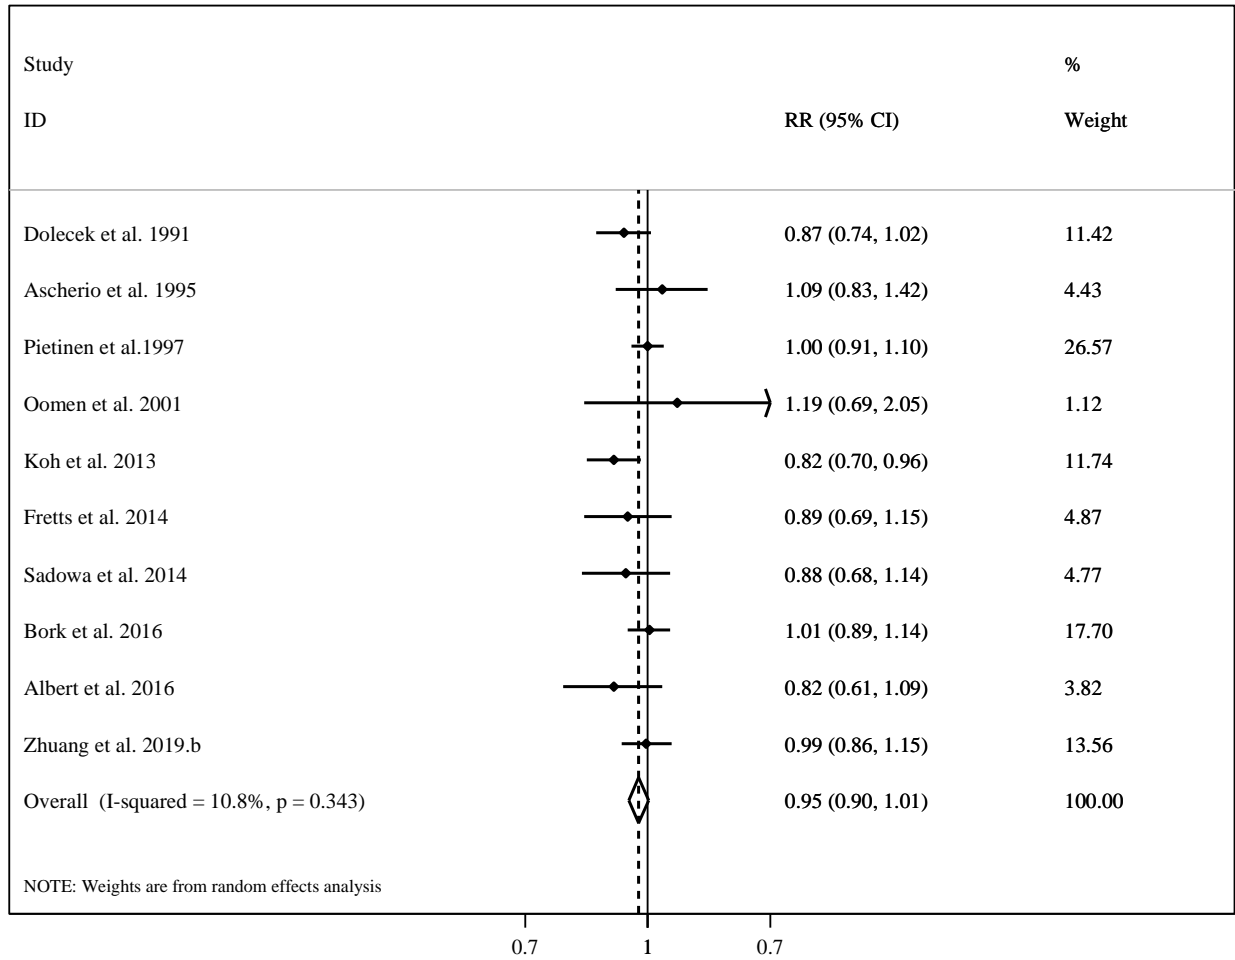

Forest plot for the association between dietary ALA intake and CHD mortality according to a 1-g/d increase in dietary ALA

**Online Supporting Material  
Supplemental Figure 11**

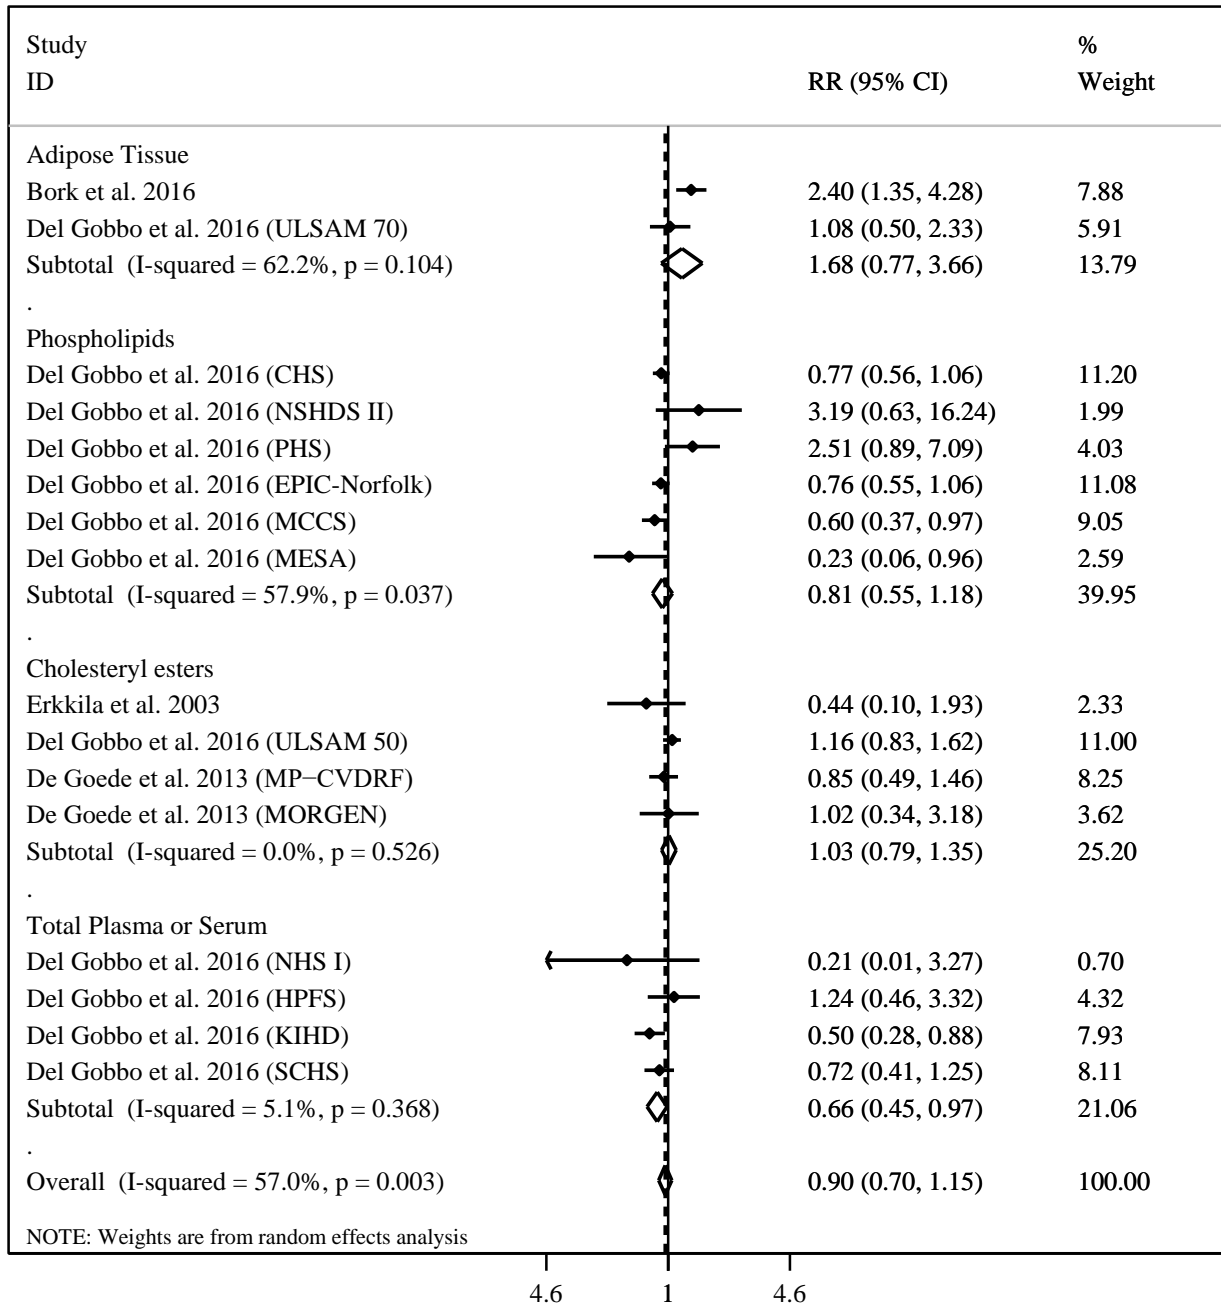

Forest plot for the association between tissue ALA levels and CHD mortality by comparing the highest and lowest levels of ALA

**Online Supporting Material  
Supplemental Figure 12**

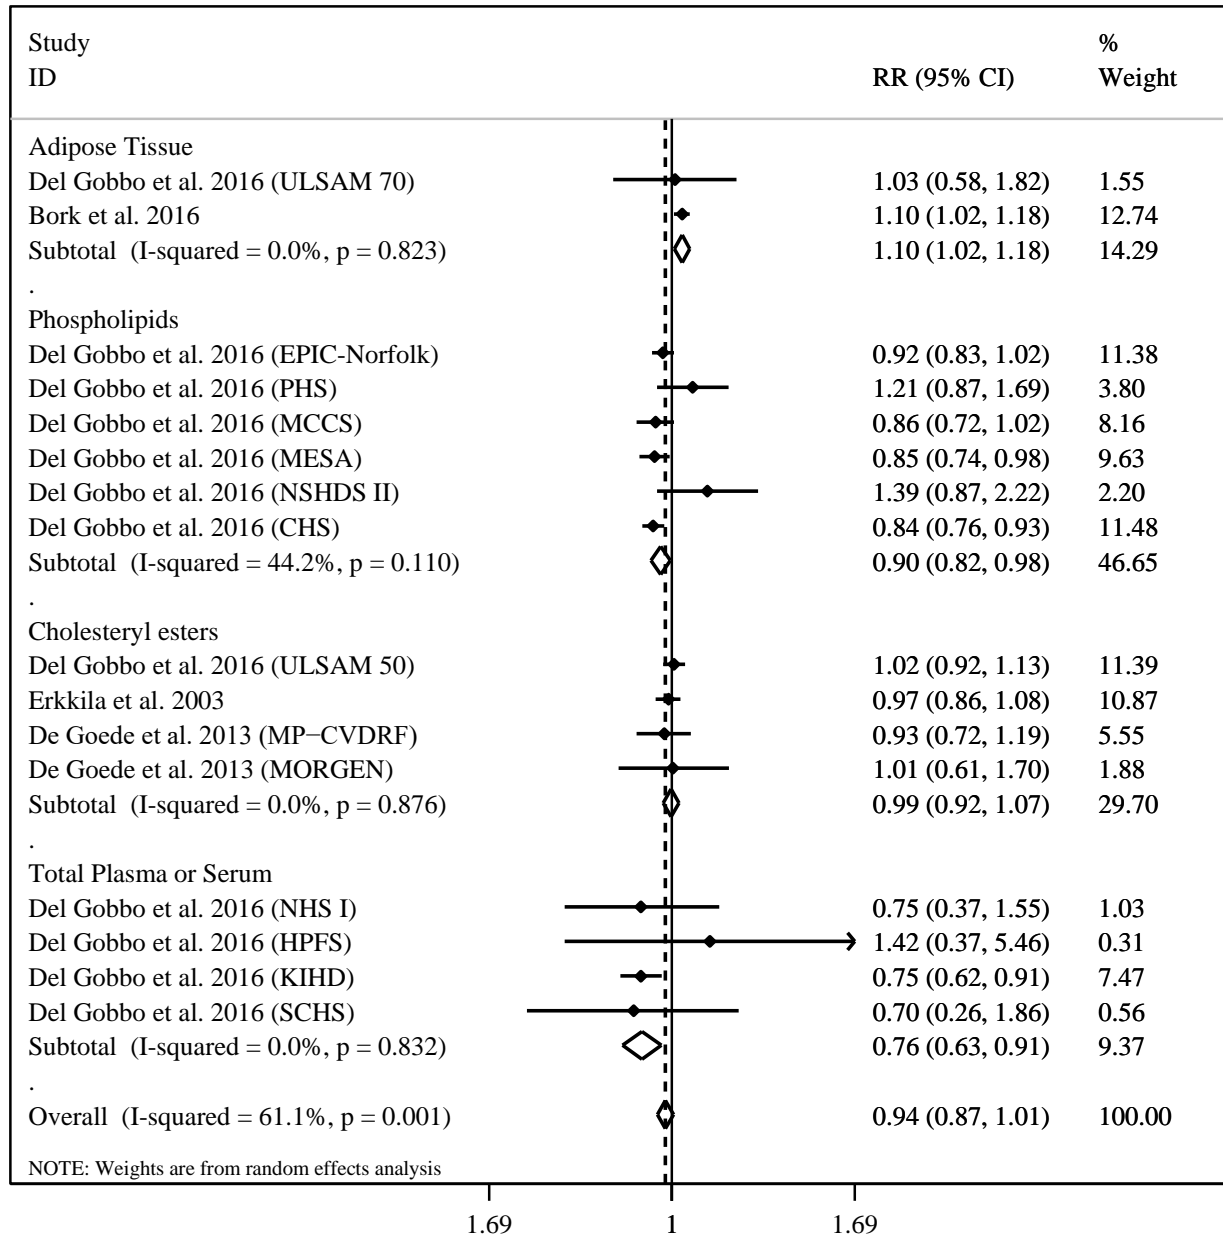

Forest plot for the association between tissue ALA levels and CHD mortality according to a 1-SD increase in the levels of ALA

**Online Supporting Material  
Supplemental Figure 13**

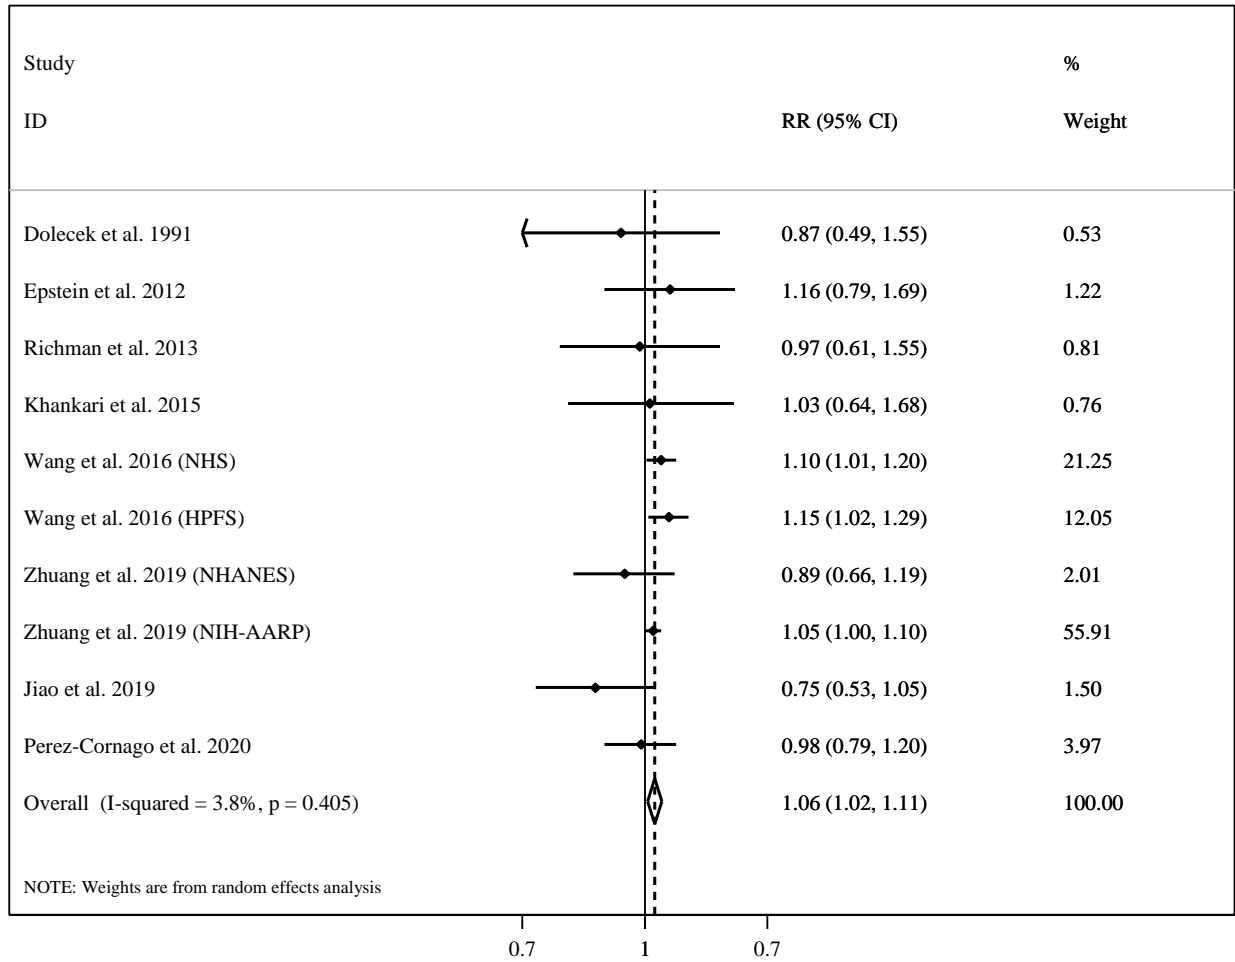

Forest plot for the association between dietary ALA intake and cancer mortality by comparing the highest and lowest intakes of ALA

**Online Supporting Material  
Supplemental Figure 14**

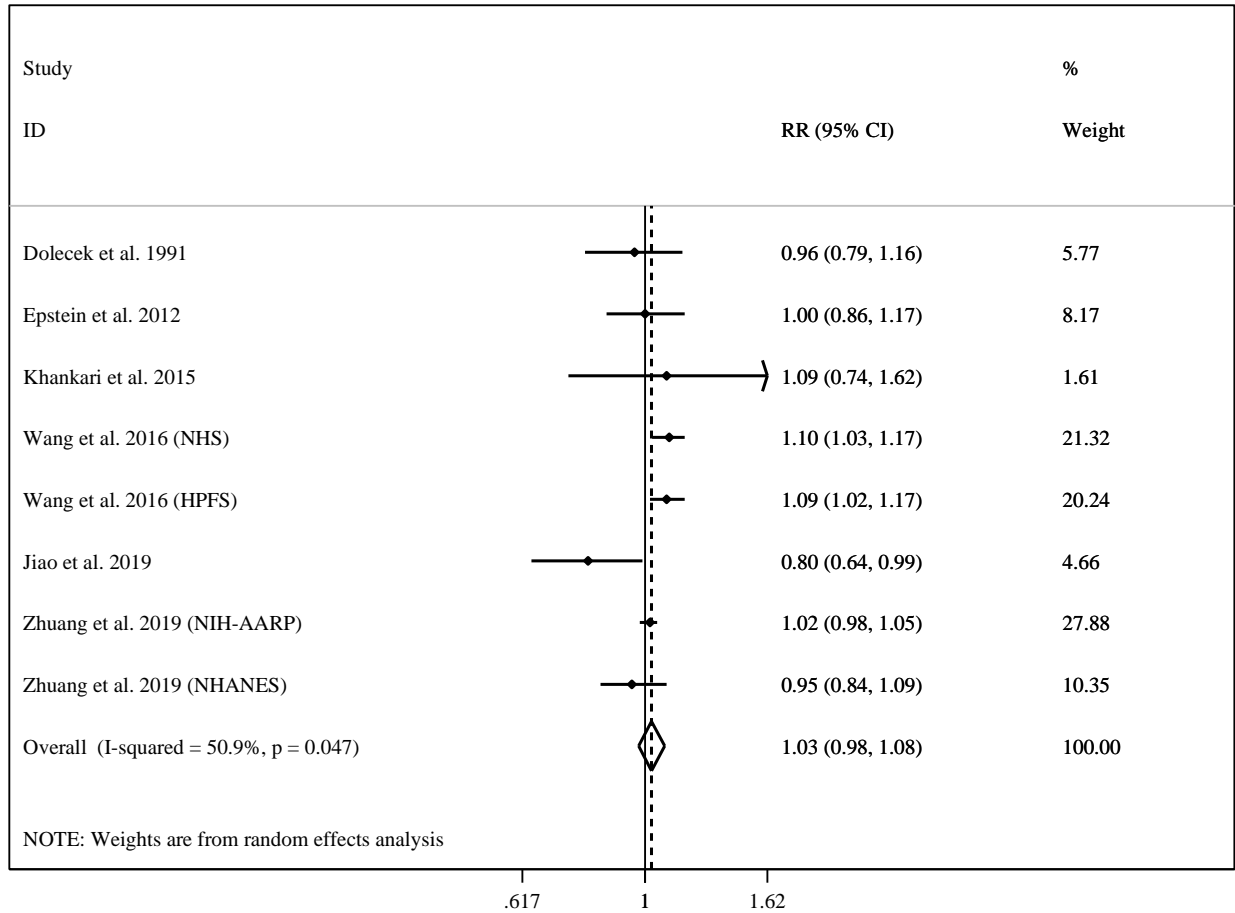

Forest plot for the association between dietary ALA intake and cancer mortality according to a 1-g/d increase in dietary ALA

**Online Supporting Material  
Supplemental Figure 15**

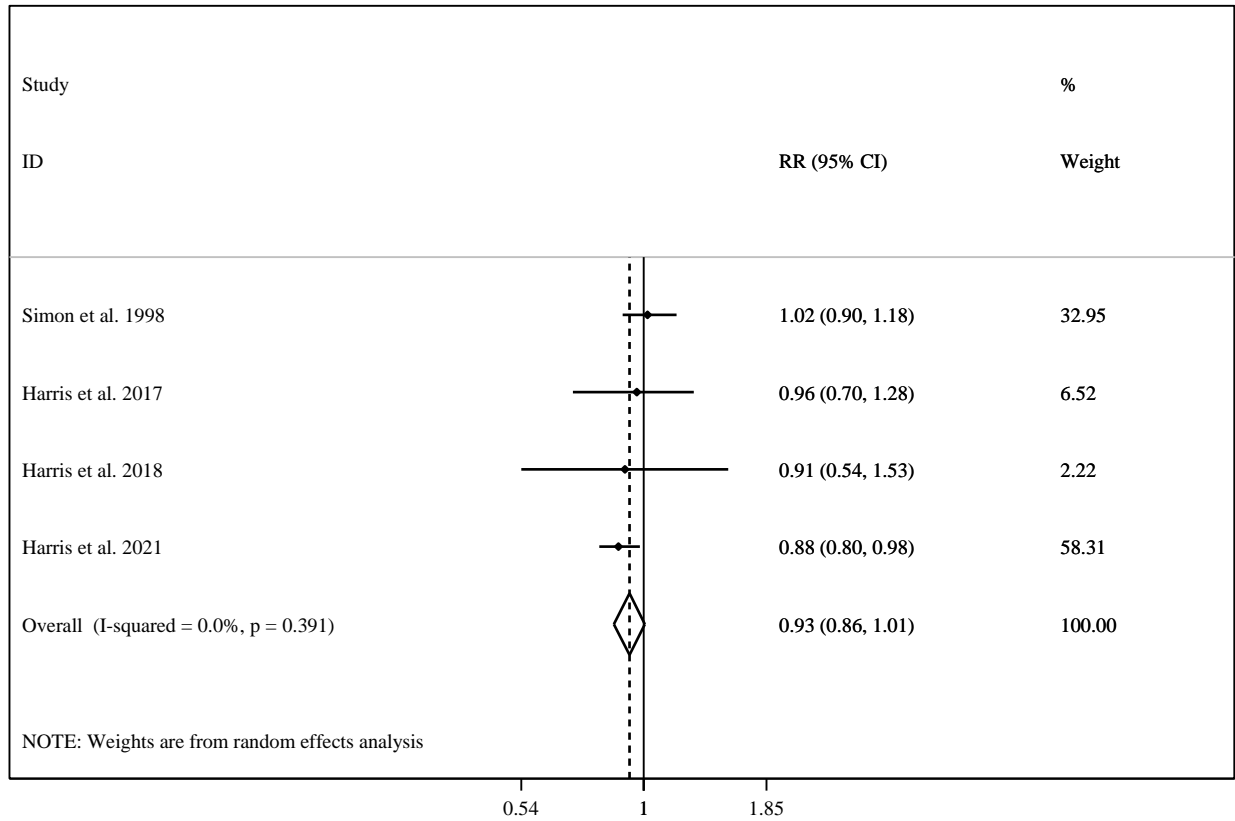

Forest plot for the association between tissue ALA levels and cancer mortality by comparing the highest and lowest levels of ALA

**Online Supporting Material  
Supplemental Figure 16**

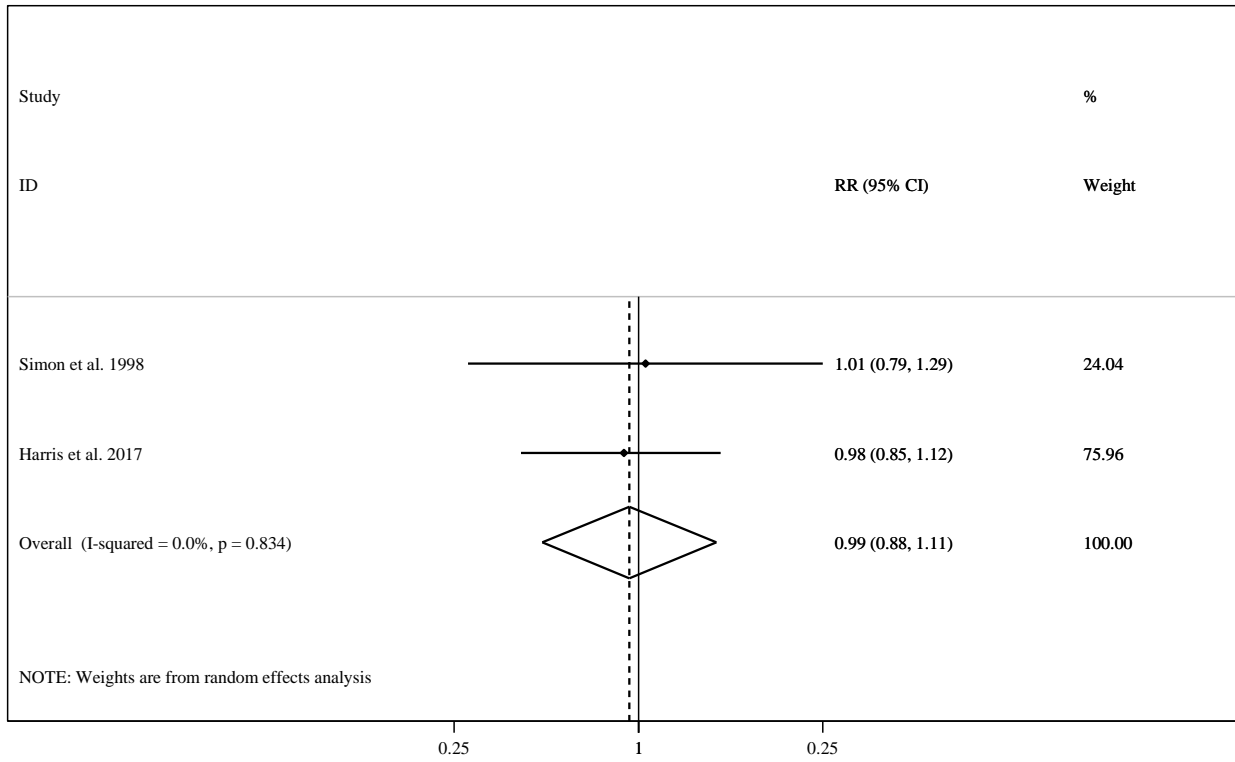

Forest plot for the association between tissue ALA levels and cancer mortality based on a 1-SD increase in ALA levels



**Online Supporting Material  
Supplemental Figure 17**

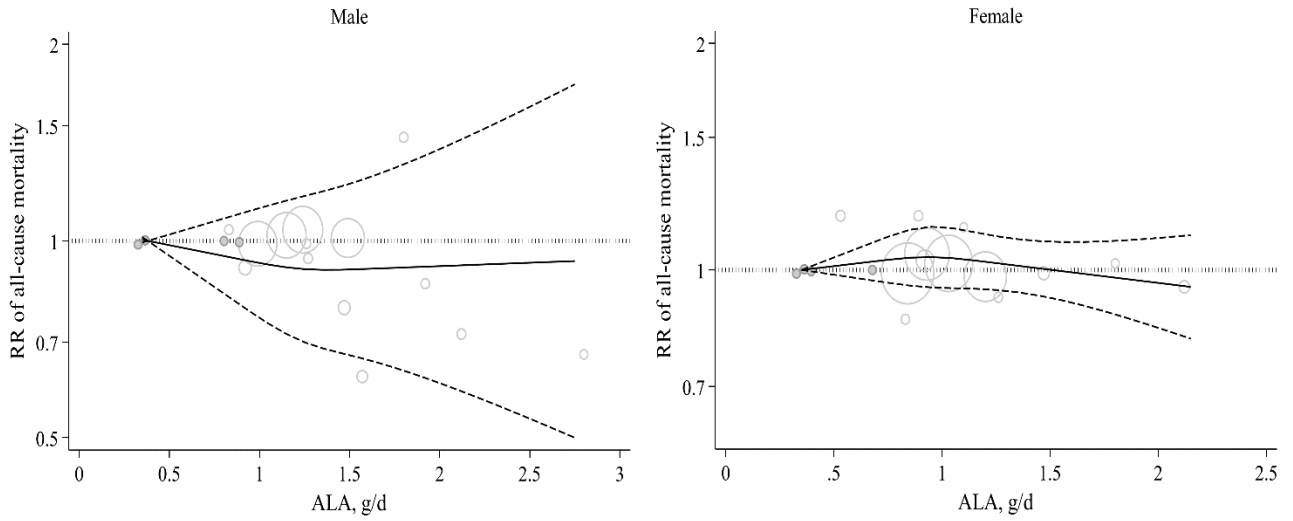

Non-linear dose-response association of  $\alpha$ -linolenic acid intake (based on g/day) with risk of mortality from all-cause in men and women aged  $\geq 18$  years. Solid line indicates the spline model. Dashed line presents the 95% CI. RR: relative risk, CI: confidence interval
